# Supplementary material for: DFT study on the iridium-catalyzed multi-alkylation of alcohol with ammonia
Source: Royal Society of Chemistry journal article supplement (doi:10.1039/c6ra19175d), 2016-01-01
Supplement: c6ra19175d1.pdf [file c6ra19175d1.pdf]

*SUPPORTING INFORMATION*

**DFT Study on the Iridium-Catalyzed Multi-alkylation of  
Alcohol with Ammonia**

Dan-Dan Zhang <sup>a</sup>, Xian-Kai Chen <sup>a</sup>, Hui-Ling Liu <sup>a\*</sup>, Xu-Ri Huang <sup>a</sup>

<sup>a</sup> *Institute of Theoretical Chemistry, Jilin University, Liutiao Road 2, Technology*

*Building of Jilin University, Changchun 130023, China*

\*E-mail: [huling@jlu.edu.cn](mailto:huling@jlu.edu.cn)(H.-L. L.);

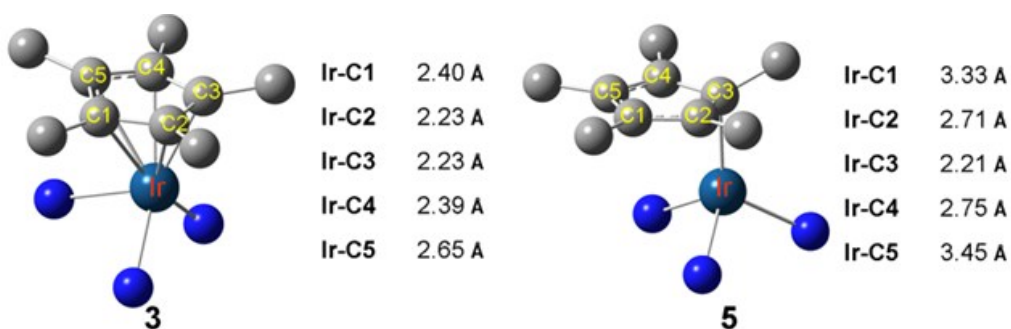

**Figure S1.** : ‘3’ and ‘5’ represent the precursor structures in triple and quintet state, respectively. The corresponding bond lengths were listed in the right. The hydrogen atoms have been omitted for clarity.

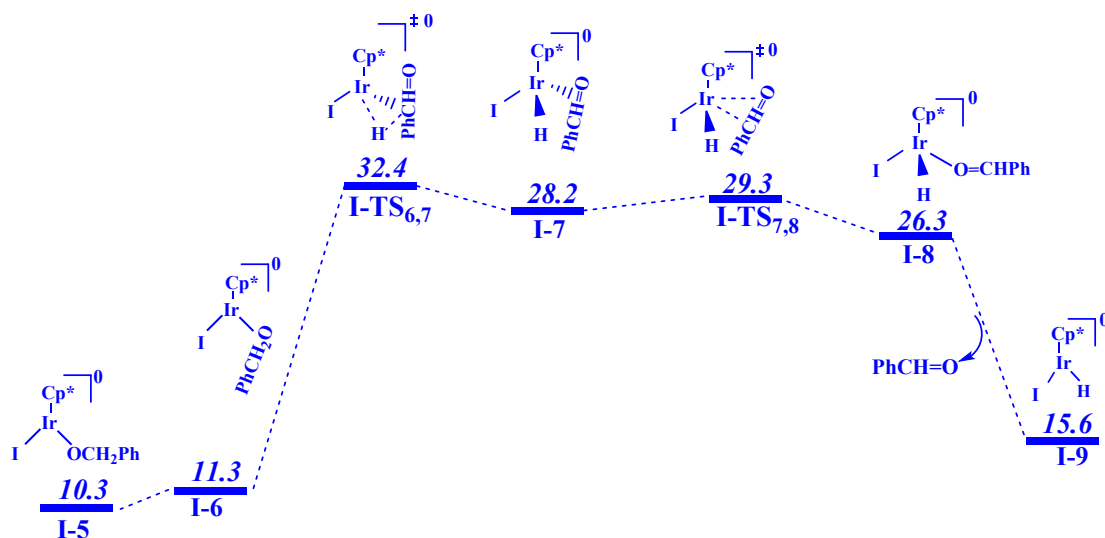

**Figure S2.** Relative free energy profile for the generation of free benzaldehyde catalyzed by catalyst **I-5** (italic numbers in kcal/mol).

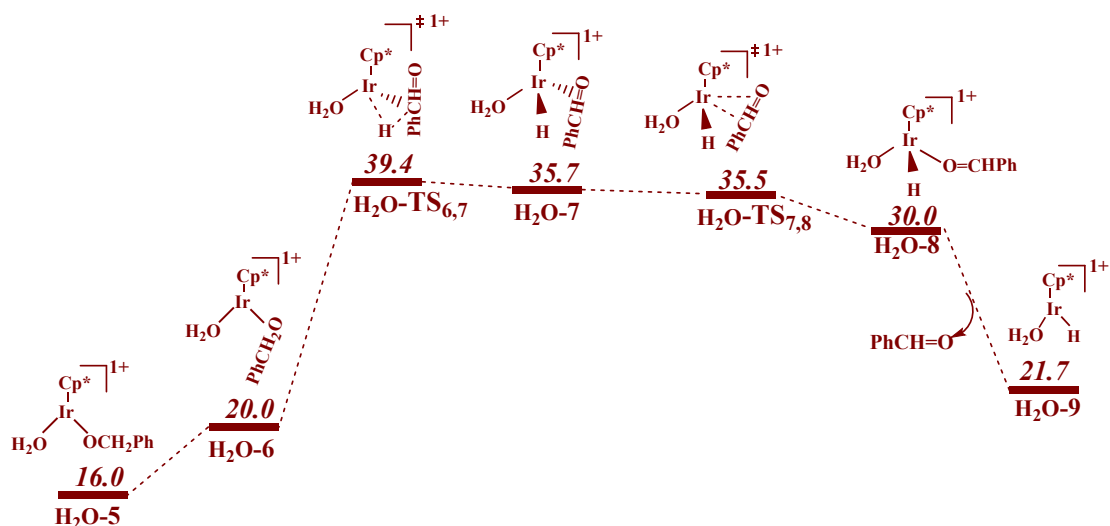

**Figure S3.** Relative free energy profile for the generation of free benzaldehyde catalyzed by catalyst H<sub>2</sub>O-5 (italic numbers in kcal/mol).

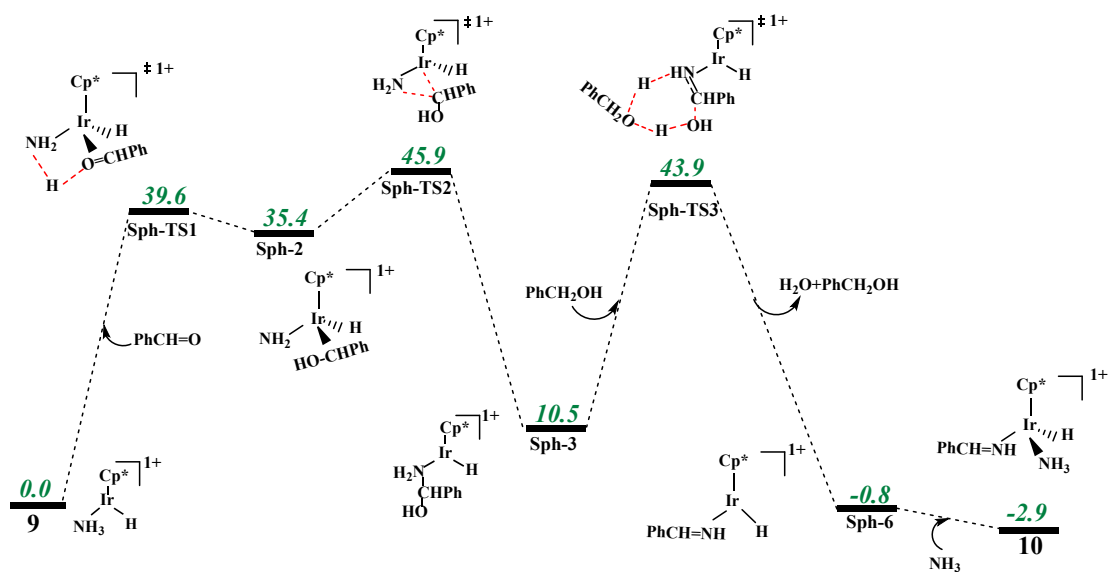

**Figure S4.** Relative free energy profile for the generation of imine PhCH=NH on the metal coordination sphere (italic numbers in kcal/mol).

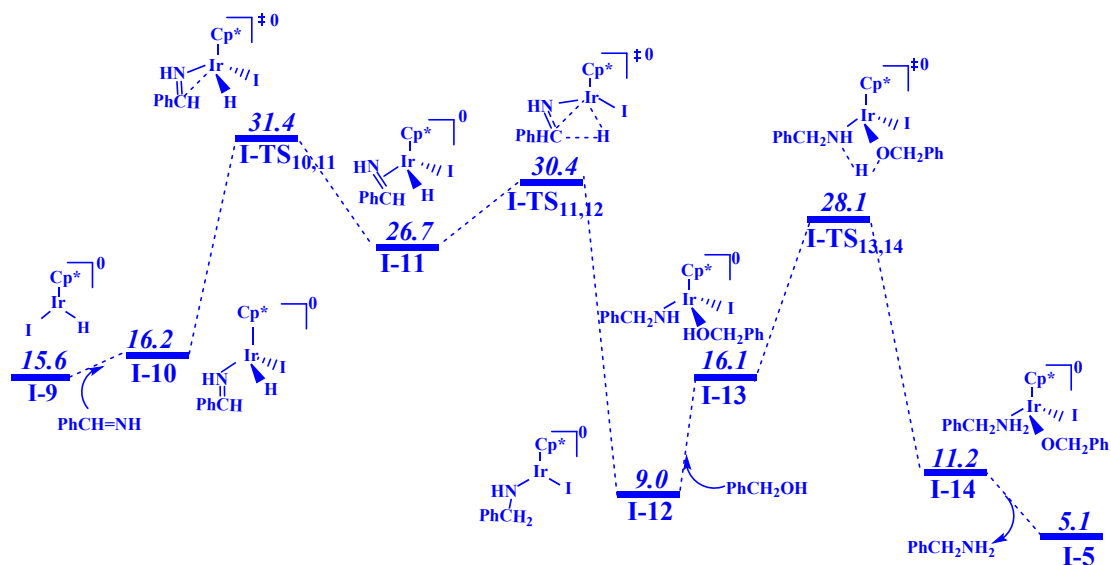

**Figure S5.** Relative free energy profile for the reduction of the PhCH=NH by the Ir-H reductant I-9 to afford first amine PhCH<sub>2</sub>NH<sub>2</sub> (italic numbers in kcal/mol).

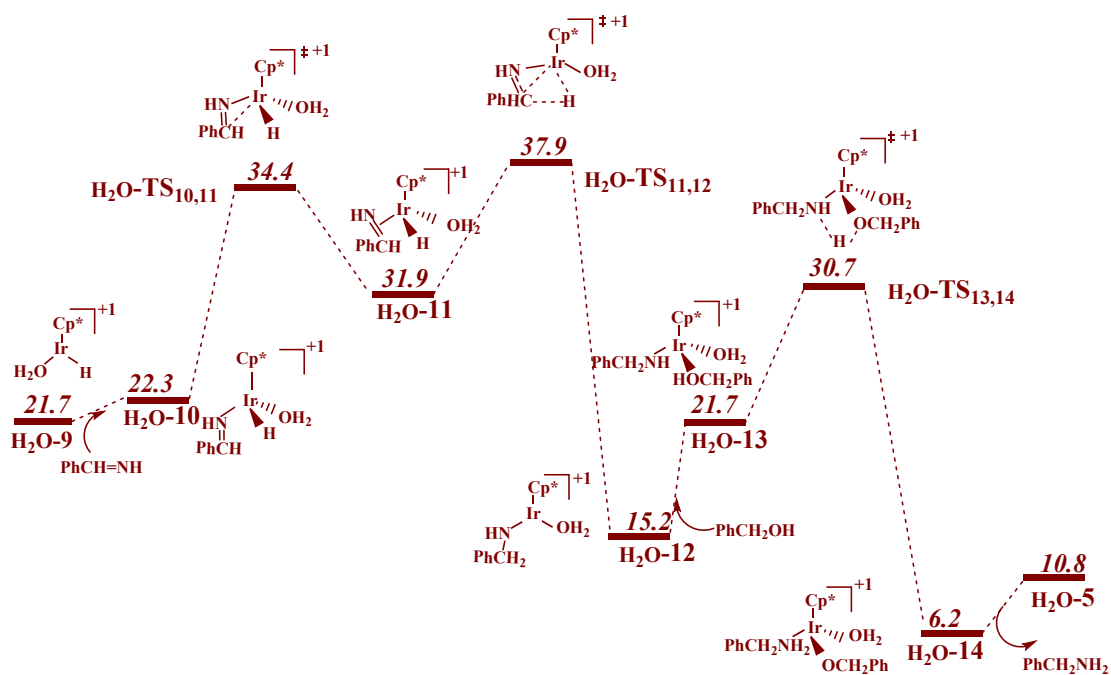

**Figure S6.** Relative free energy profile for the reduction of the PhCH=NH by the Ir-H reductant H<sub>2</sub>O-9 to afford first amine PhCH<sub>2</sub>NH<sub>2</sub> (italic numbers in kcal/mol).

As shown in Figure S8, transition state **I-TS<sub>11,12</sub>** describes that free anion iodine I<sup>-</sup> simultaneously H-bonds to one H atom of NH<sub>3</sub> ligand and two H atoms of Cp\* ligand. Notice that the normal hydrogen transfer active barrier from intermediate **11** to transition state **TS<sub>11,12</sub>** is 5.7 kcal/mol, whereas, the active barrier from **I-11** to **I-TS<sub>11,12</sub>** affected by second coordination H-bonds is 1.3 kcal/mol. The analogous transition states **Cl-TS<sub>11,12</sub>** and **Br-TS<sub>11,12</sub>** were also located and the corresponding active barriers are 3.0 kcal/mol and 5.6 kcal/mol, respectively. These energies were recalculated by employing a series of the functionals M06-2X, M06-L, B3pw91, TPSS, and PBE which are usually used in transition-metal catalytic system. The corresponding free energies were comparatively listed in Table S1 and the same energy trends were found, where the energies of both M06-L and B3pw91 are very similar to M06. Therefore, counter anion I<sup>-</sup> can more effectively facilitate the reduction hydrogen transfer by the second coordination sphere hydrogen-bonding interactions than halogen anion Cl<sup>-</sup> and Br<sup>-</sup>, which is in consistent the experimental result.

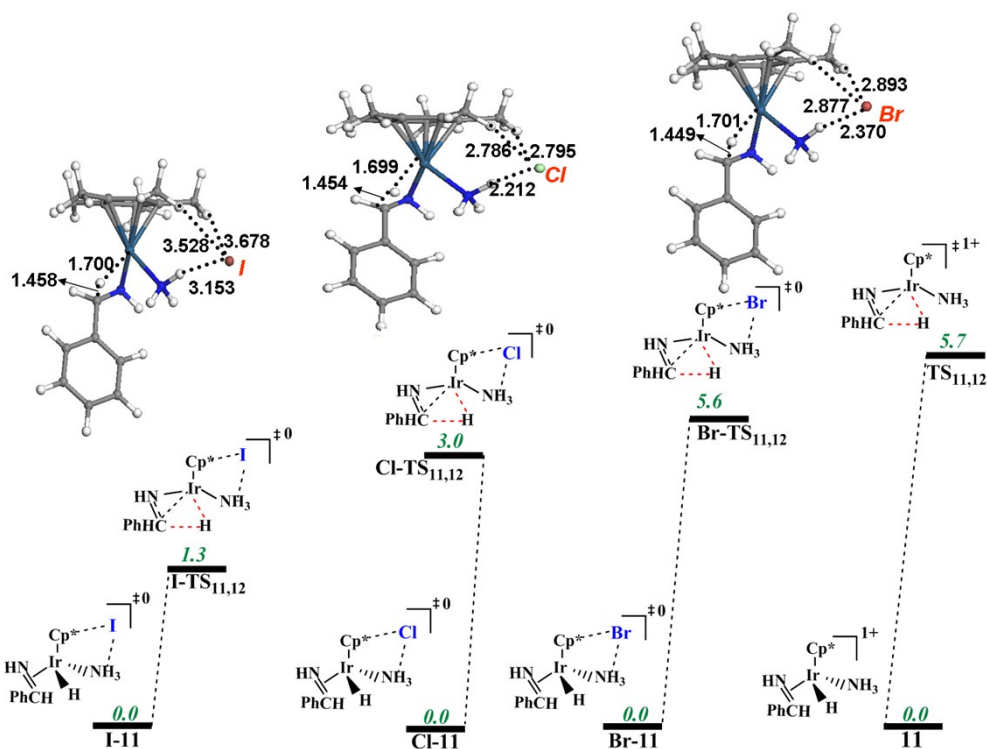

**Figure S7.** The free energies (italic numbers in kcal/mol) and the optimized transition states structures (bond length/Å) for PhCH=NH reduction hydrogen transfer affected by the second coordination H-bonding effects with counter anions I<sup>-</sup>, Cl<sup>-</sup>, and Br<sup>-</sup>.

**Table S1.** The single-point calculations (in kcal/mol) for four activation barriers ( $\Delta G^\ddagger$ ) in Figure 7 on the basis of various DFT functionals including M06, M06-2X, M06-L, B3PW91, TPSS, and PBE.

| $\Delta G^\ddagger$                 | M06 | M06-2X | M06-L | B3pw91 | TPSS | PBE |
|-------------------------------------|-----|--------|-------|--------|------|-----|
| <b>11</b> →TS <sub>11,12</sub>      | 5.7 | 7.4    | 5.4   | 5.7    | 6.5  | 6.5 |
| <b>I-11</b> →I-TS <sub>11,1</sub>   | 1.3 | 3.1    | 1.4   | 0.6    | 1.8  | 2.8 |
| <b>Cl-11</b> →Cl-TS <sub>11,1</sub> | 3.0 | 5.2    | 3.7   | 3.8    | 4.8  | 5.4 |
| <b>Br-11</b> →Br-TS <sub>11,1</sub> | 5.6 | 7.7    | 5.3   | 5.1    | 7.1  | 7.5 |

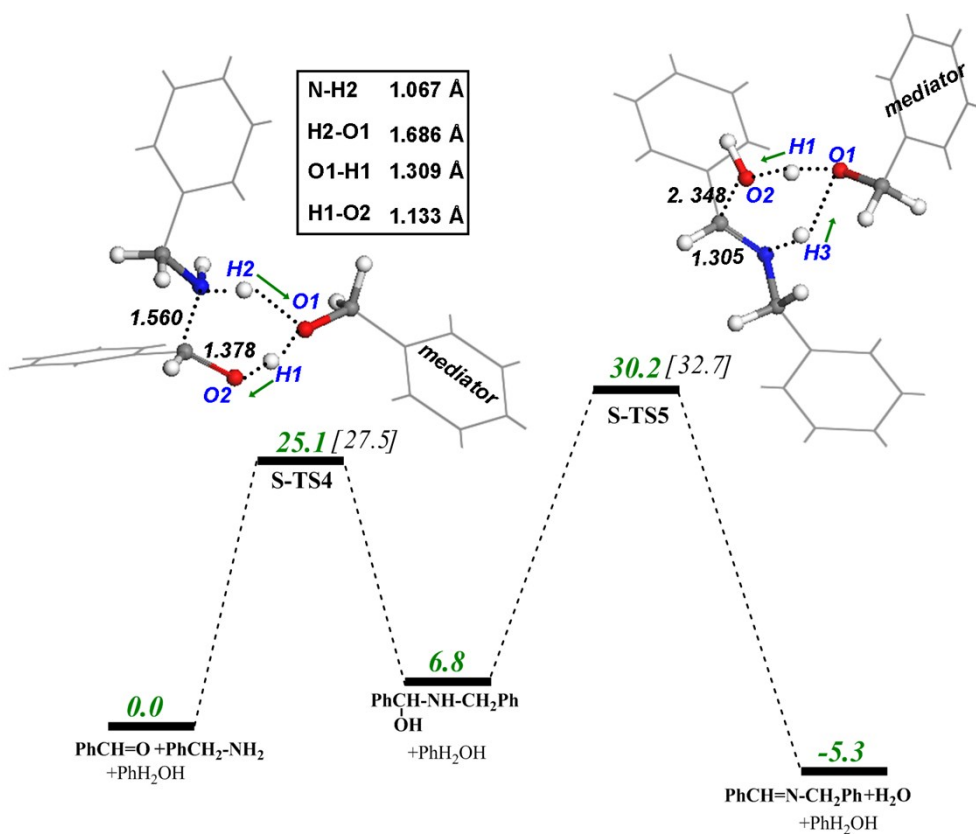

**Figure S8.** Relative free energy profile (italic numbers in kcal/mol) and optimized transition states structures (bond length/Å) for formation of dibenzylimine ( $\text{PhCH=NCH}_2\text{Ph}$ ) from benzaldehyde ( $\text{PhCH=O}$ ) with benzyl amine ( $\text{PhCH}_2\text{NH}_2$ ) mediated by one benzyl alcohol molecule. When water is used as mediator, the corresponding free energy barriers are given in square bracket.

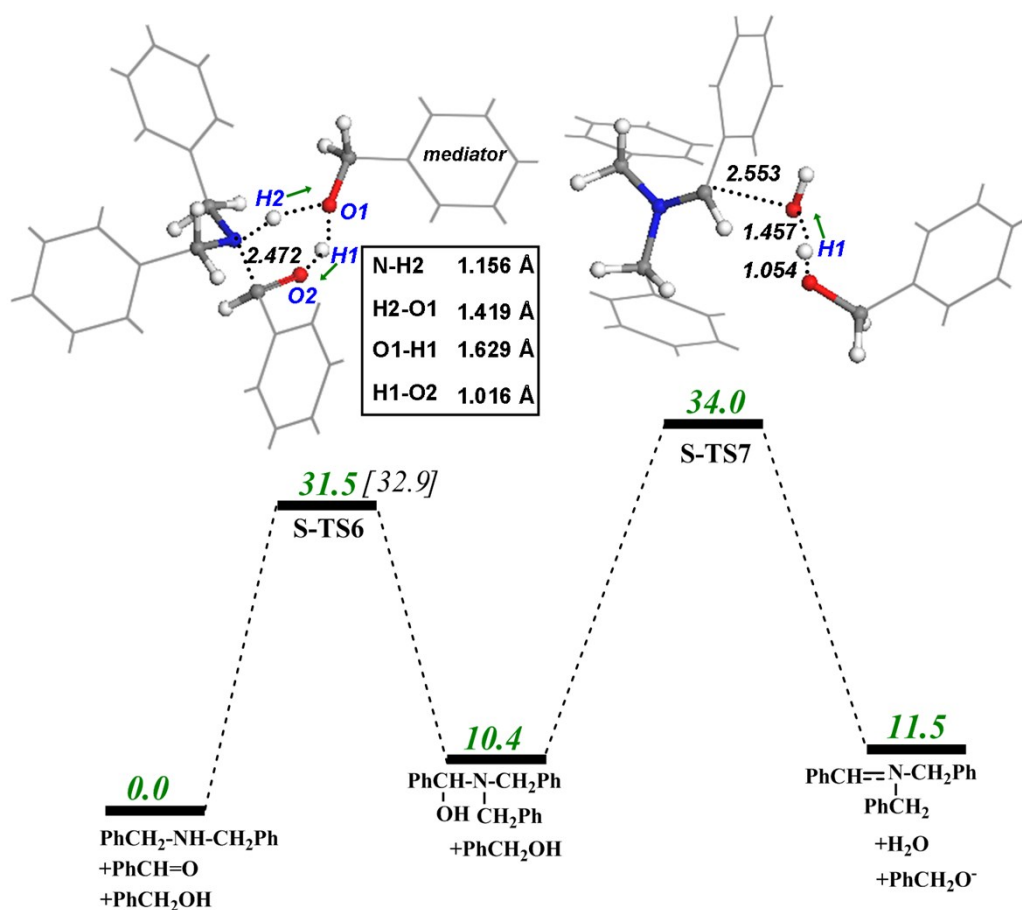

**Figure S9.** Relative free energy profile (italic numbers in kcal/mol) and optimized transition states structures (bond length/Å) for formation of  $\text{PhCH}=\text{N}-(\text{CH}_2\text{Ph})\text{CH}_2\text{Ph}$ .



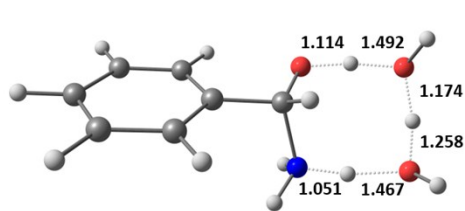

**2-H<sub>2</sub>O-S-TS1**  
 $\Delta G^\ddagger = 32.6$  kcal/mol

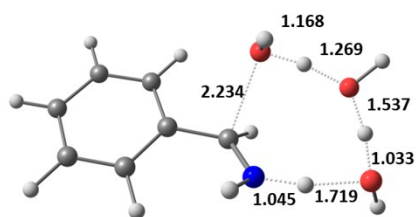

**2-H<sub>2</sub>O-S-TS2**  
 $\Delta G^\ddagger = 40.4$  kcal/mol

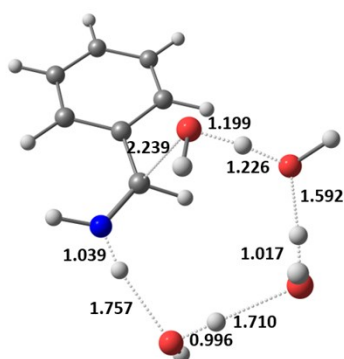

**3-H<sub>2</sub>O-S-TS2**  
 $\Delta G^\ddagger = 47.4$  kcal/mol

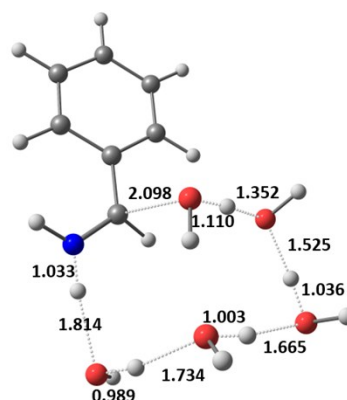

**4-H<sub>2</sub>O-S-TS2**  
 $\Delta G^\ddagger = 58.2$  kcal/mol

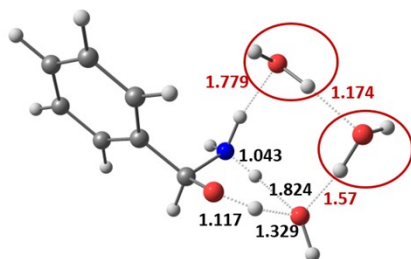

**H-bond-S-TS1**  
 $\Delta G^\ddagger = 38.8$  kcal/mol

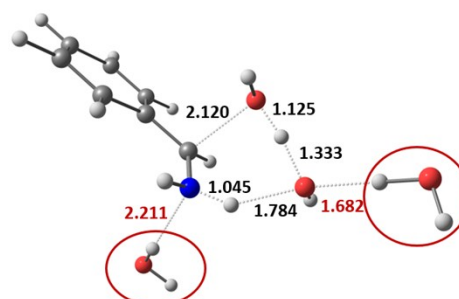

**H-bond-S-TS2**  
 $\Delta G^\ddagger = 52.4$  kcal/mol

**Figure S10.** Both 2-H<sub>2</sub>O-S-TS1 and 2-H<sub>2</sub>O-S-TS2 involve two waters to assist the proton transfer. 3-H<sub>2</sub>O-S-TS1 involve three waters to assist the proton transfer. 4-H<sub>2</sub>O-S-TS1 involve four waters to assist the proton transfer. Both H-bond-S-TS1 and H-bond-S-TS2 involve one water to promote proton transfer and two more waters to H-bond to the transition state structures (see red font). (Bond length/Å).

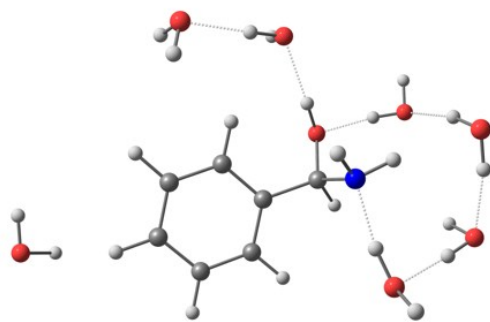

**Waters-1**

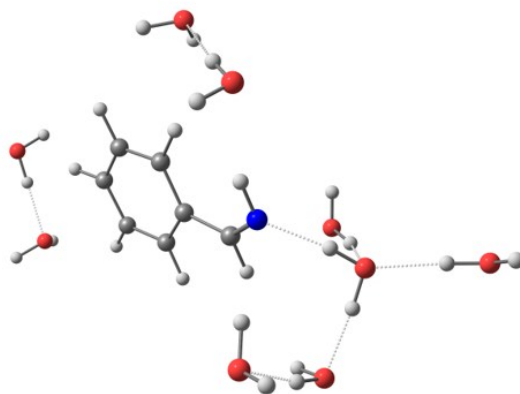

**Waters-2**

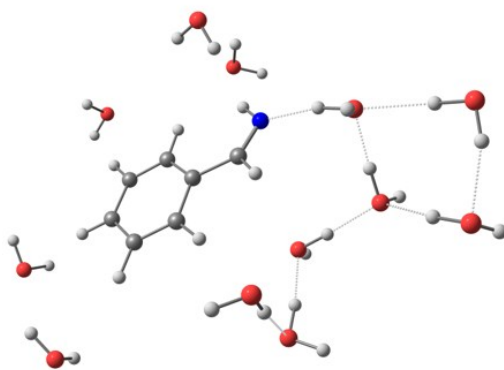

**Waters-3**

**Figure S11.** **Waters-1:** the initial structure with seven waters were optimized to hemiaminal with water cluster. **Waters-2:** the initial structure with eight waters were optimized to imine with water cluster. **Waters-3:** the initial structure with eleven waters were optimized to imine with water cluster.

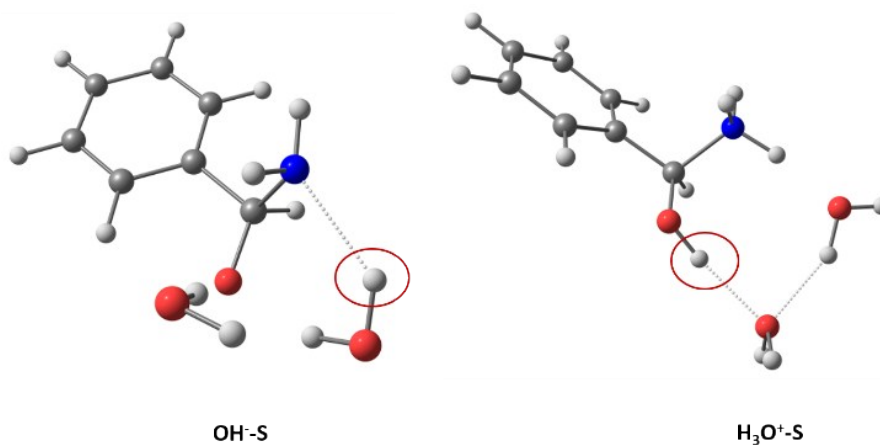

**Figure S12.** **OH-S** is the optimized stable structure by the adding of the  $\text{OH}^-$  where the hydrogen of ammonia is abstracted by  $\text{OH}^-$ . **H<sub>3</sub>O<sup>+</sup>-S** is the optimized stable structure by the adding of the  $\text{H}_3\text{O}^+$  where the proton of  $\text{H}_3\text{O}^+$  transfers to O atom of aldehyde.

**Cartesian coordinates, atom numbers, and Gibbs free energies [in Hartree and  
at the M06/BSII (SMD, water) level of theory] for the key structures involved in  
this stud**

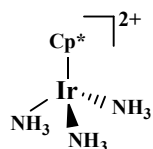

**1**

E=-663.7311814 (au)

|    |             |             |             |
|----|-------------|-------------|-------------|
| C  | 1.35608300  | -1.07135400 | 0.43590900  |
| C  | 1.34449700  | 0.17046800  | 1.18828300  |
| C  | 1.23062500  | 1.26506500  | 0.26725100  |
| C  | 1.32277800  | -0.72066200 | -0.97418000 |
| C  | 1.22224900  | 0.70535200  | -1.08611100 |
| Ir | -0.54190900 | -0.03732900 | 0.01505600  |
| N  | -1.89596500 | -0.25174100 | 1.72152100  |
| H  | -2.82781100 | 0.12821100  | 1.55166800  |
| H  | -2.01665800 | -1.23102900 | 1.98007300  |
| N  | -1.87947100 | -1.46538200 | -0.93566500 |
| H  | -2.34766600 | -1.06919400 | -1.75101600 |
| H  | -1.35047200 | -2.27428500 | -1.25973900 |
| N  | -1.99670400 | 1.46807800  | -0.62864100 |
| H  | -2.20906500 | 2.11559500  | 0.12995500  |
| H  | -1.60808900 | 2.02023400  | -1.39230900 |
| H  | -1.52061700 | 0.22721400  | 2.53952900  |
| H  | -2.60998600 | -1.81487600 | -0.31463900 |
| H  | -2.88452600 | 1.08428000  | -0.95429200 |
| C  | 1.44673900  | 0.27990400  | 2.67512500  |
| H  | 2.50508300  | 0.32142000  | 2.96029200  |
| H  | 0.96476000  | 1.18569800  | 3.04950100  |
| H  | 1.00462300  | -0.58582800 | 3.17356300  |

|   |            |             |             |
|---|------------|-------------|-------------|
| C | 1.58537200 | -2.44258900 | 0.99281400  |
| H | 1.09951500 | -3.20605600 | 0.37991100  |
| H | 2.65811300 | -2.67030700 | 1.02063300  |
| H | 1.20138600 | -2.52751900 | 2.01212500  |
| C | 1.40104000 | -1.69371400 | -2.10634400 |
| H | 0.93248300 | -1.30031200 | -3.01075100 |
| H | 2.45311200 | -1.90178800 | -2.33630400 |
| H | 0.92835200 | -2.64606800 | -1.85189600 |
| C | 1.21536600 | 1.50089800  | -2.35370600 |
| H | 0.62429600 | 2.41464200  | -2.24860200 |
| H | 2.23827600 | 1.79814000  | -2.61505300 |
| H | 0.81031000 | 0.92144300  | -3.18634900 |
| C | 1.25390900 | 2.72460200  | 0.59813700  |
| H | 0.92965900 | 2.90917500  | 1.62455400  |
| H | 2.27377800 | 3.11412800  | 0.49207800  |
| H | 0.61117200 | 3.29691300  | -0.07584700 |

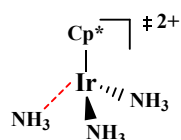

**TS<sub>1,2</sub>**

E=-663.7091249(au)

|    |             |             |             |
|----|-------------|-------------|-------------|
| C  | 0.83709600  | 1.52350700  | -0.49077600 |
| C  | 1.38235900  | 0.38068000  | -1.14818700 |
| C  | 1.70327400  | -0.61642100 | -0.12749300 |
| C  | 0.87803800  | 1.27585000  | 0.95580200  |
| C  | 1.43478200  | -0.01581400 | 1.17821000  |
| Ir | -0.40850300 | -0.24960900 | -0.03569800 |

|   |             |             |             |
|---|-------------|-------------|-------------|
| N | -1.55018000 | -1.03929500 | -1.69575200 |
| H | -1.58308100 | -2.05940300 | -1.69126100 |
| H | -2.51178800 | -0.70235900 | -1.65000900 |
| N | -3.30752000 | 0.84227000  | 0.29446000  |
| H | -3.50138400 | 1.02264900  | 1.27694800  |
| H | -3.46758900 | 1.71574400  | -0.20198200 |
| N | -1.46046000 | -1.77618800 | 1.10721500  |
| H | -1.55596700 | -2.65182700 | 0.59289000  |
| H | -0.98262700 | -1.98827700 | 1.98229300  |
| H | -1.16363600 | -0.75444800 | -2.59493700 |
| H | -4.01735000 | 0.18676900  | -0.02708100 |
| H | -2.40032500 | -1.45087400 | 1.33381500  |
| C | 1.60278100  | 0.21110200  | -2.61593800 |
| H | 2.64196200  | 0.46517800  | -2.85702600 |
| H | 1.43378400  | -0.82224500 | -2.92899400 |
| H | 0.95229700  | 0.86589700  | -3.19909300 |
| C | 0.38821900  | 2.79964900  | -1.12599300 |
| H | -0.46568400 | 3.22761400  | -0.59545100 |
| H | 1.20196500  | 3.53458000  | -1.09406100 |
| H | 0.10899400  | 2.65186100  | -2.17112700 |
| C | 0.45090400  | 2.25806600  | 1.99659200  |
| H | 0.24779100  | 1.77007000  | 2.95172300  |
| H | 1.25001900  | 2.99314500  | 2.15405600  |
| H | -0.44293300 | 2.80436200  | 1.68530900  |
| C | 1.71164800  | -0.66124800 | 2.49739500  |
| H | 1.57557600  | -1.74450100 | 2.44782100  |
| H | 2.75199900  | -0.47158100 | 2.78810400  |

|   |            |             |             |
|---|------------|-------------|-------------|
| H | 1.06465900 | -0.26397300 | 3.28223300  |
| C | 2.40282700 | -1.91527900 | -0.35824500 |
| H | 2.18226600 | -2.32057200 | -1.34799400 |
| H | 3.48714800 | -1.75946500 | -0.29128500 |
| H | 2.12419800 | -2.65648600 | 0.39417000  |

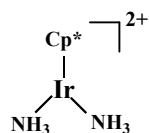

**2**

E=-607.1563039(au)

|    |             |             |             |
|----|-------------|-------------|-------------|
| C  | -1.25789500 | -1.18477100 | -0.07092200 |
| C  | -0.55595100 | -1.08638300 | 1.18459300  |
| C  | 0.88320600  | -1.15680100 | 0.91419800  |
| C  | -0.25880400 | -1.26925900 | -1.11522500 |
| C  | 1.06409300  | -1.27127700 | -0.49807800 |
| Ir | 0.00670100  | 0.60746500  | -0.05372700 |
| N  | -1.44931700 | 2.23273900  | -0.10889400 |
| H  | -1.32231100 | 2.85894900  | 0.68723800  |
| H  | -1.33490100 | 2.79485100  | -0.95348400 |
| N  | 1.57402200  | 2.15928600  | -0.10923400 |
| H  | 1.49330400  | 2.78665800  | 0.69155400  |
| H  | 2.50351100  | 1.74317900  | -0.09273500 |
| H  | -2.40873200 | 1.89015900  | -0.08793700 |
| H  | 1.49749800  | 2.73078900  | -0.95124300 |
| C  | -1.17156000 | -1.01740300 | 2.54052200  |
| H  | -1.24644000 | -2.03266600 | 2.95076700  |
| H  | -0.56169000 | -0.42546900 | 3.22667000  |



|   |             |             |             |
|---|-------------|-------------|-------------|
| H | -2.17685300 | -0.59329400 | 2.50489000  |
| C | -2.73928200 | -1.24300800 | -0.26335000 |
| H | -3.03645500 | -0.78820600 | -1.21107800 |
| H | -3.06985500 | -2.28842300 | -0.27543700 |
| H | -3.26847500 | -0.73403400 | 0.54529100  |
| C | -0.52593700 | -1.41485800 | -2.57335800 |
| H | 0.25874500  | -0.94906900 | -3.17351000 |
| H | -0.54771000 | -2.48354300 | -2.82351700 |
| H | -1.48980500 | -0.98476700 | -2.85214500 |
| C | 2.36122800  | -1.40980600 | -1.22671600 |
| H | 3.19090700  | -0.99919500 | -0.64766400 |
| H | 2.56983100  | -2.47092400 | -1.40845200 |
| H | 2.33021500  | -0.90551300 | -2.19550500 |
| C | 1.95616000  | -1.14553600 | 1.95169400  |
| H | 1.66927300  | -0.54474100 | 2.81767500  |
| H | 2.13346500  | -2.17056500 | 2.29983000  |
| H | 2.89601400  | -0.75853500 | 1.55256300  |

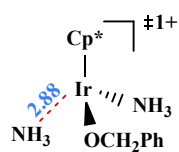

### TS<sub>2,5</sub>

E=-953.3202416 (au)

|   |             |             |             |
|---|-------------|-------------|-------------|
| C | -2.59726700 | 1.84165900  | 0.79696200  |
| C | -3.33191800 | 1.18019800  | -0.28845200 |
| C | -3.93882400 | -0.00201400 | 0.23115100  |
| C | -2.76383300 | 1.05792600  | 1.98287100  |
| C | -3.65334100 | -0.05577200 | 1.65313200  |

|    |             |             |             |
|----|-------------|-------------|-------------|
| Ir | -4.72562700 | 1.78978800  | 1.33080100  |
| N  | -5.72686800 | 4.04977100  | -0.19117900 |
| H  | -5.91329600 | 4.45067000  | 0.72717200  |
| H  | -4.89308800 | 4.51248600  | -0.54519600 |
| H  | -4.51075800 | 3.12010500  | 4.42952700  |
| H  | -3.68278900 | 4.09168800  | 3.19405200  |
| N  | -6.88251500 | 1.55574500  | 1.17086000  |
| H  | -7.19352200 | 1.94603000  | 0.28381100  |
| H  | -7.26032300 | 0.61660900  | 1.26961800  |
| H  | -6.48553800 | 4.32452600  | -0.81406000 |
| H  | -7.23640000 | 2.14675000  | 1.92737100  |
| C  | -3.34889200 | 1.63054200  | -1.71580800 |
| H  | -2.47325800 | 1.23042800  | -2.24177700 |
| H  | -4.24085800 | 1.28104900  | -2.23893600 |
| H  | -3.31460000 | 2.71848300  | -1.79685800 |
| C  | -1.72126000 | 3.04665600  | 0.64220700  |
| H  | -1.62468900 | 3.60061300  | 1.57851300  |
| H  | -0.71519200 | 2.74058600  | 0.33066500  |
| H  | -2.10538600 | 3.73007800  | -0.11822900 |
| C  | -2.10618200 | 1.27701400  | 3.30888600  |
| H  | -2.76171500 | 0.99608100  | 4.13629600  |
| H  | -1.20188600 | 0.65996300  | 3.37602300  |
| H  | -1.80960600 | 2.31773200  | 3.44845700  |
| C  | -4.02008500 | -1.17074900 | 2.58244600  |
| H  | -4.96917200 | -1.63506000 | 2.30615700  |
| H  | -3.24847100 | -1.95005600 | 2.54591300  |
| H  | -4.09703800 | -0.82682300 | 3.61586000  |

|   |             |             |             |
|---|-------------|-------------|-------------|
| C | -4.72887500 | -1.01286200 | -0.54487900 |
| H | -5.24648600 | -0.55858700 | -1.39287600 |
| H | -4.06340100 | -1.78850300 | -0.94173000 |
| H | -5.47232700 | -1.51339300 | 0.08020900  |
| C | -4.67019500 | 3.80197400  | 3.58154100  |
| O | -5.42594400 | 3.13273300  | 2.57170200  |
| C | -5.42600800 | 5.02903000  | 4.03193700  |
| C | -6.44705700 | 4.92265600  | 4.98568700  |
| C | -5.14935200 | 6.28256000  | 3.47150900  |
| C | -7.17857400 | 6.04625700  | 5.36961300  |
| H | -6.66198400 | 3.95622700  | 5.43554900  |
| C | -5.87841100 | 7.40983600  | 3.85439600  |
| H | -4.34587800 | 6.38031300  | 2.74411700  |
| C | -6.89568200 | 7.29186200  | 4.80319000  |
| H | -7.96239100 | 5.95381200  | 6.11552500  |
| H | -5.64765900 | 8.37847800  | 3.42098100  |
| H | -7.46013900 | 8.16816700  | 5.10725200  |

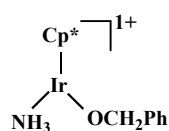

**5**

E=-896.7780979(au)

|   |             |             |             |
|---|-------------|-------------|-------------|
| C | -1.68545300 | 1.12299300  | 1.19596500  |
| C | -2.48259300 | -0.10446000 | 1.14488100  |
| C | -2.94744600 | -0.29043900 | -0.20223700 |
| C | -1.61565600 | 1.64858600  | -0.13011100 |
| C | -2.36956300 | 0.75015100  | -1.00847200 |

|    |             |             |             |
|----|-------------|-------------|-------------|
| Ir | -0.71238200 | -0.34999900 | -0.11325900 |
| H  | 1.77406500  | 1.60316600  | 0.02852400  |
| H  | 1.86095000  | 0.75862300  | 1.58730500  |
| N  | -0.30261200 | -2.30565000 | -1.01093800 |
| H  | -0.89356900 | -3.04130400 | -0.62720500 |
| H  | -0.45719600 | -2.28640200 | -2.01805700 |
| H  | 0.67310900  | -2.55481100 | -0.84956700 |
| C  | -2.84698200 | -0.93653400 | 2.33112800  |
| H  | -3.73593700 | -0.51549800 | 2.81827700  |
| H  | -3.07849900 | -1.96466700 | 2.04473000  |
| H  | -2.04128700 | -0.95294700 | 3.06898300  |
| C  | -1.11917200 | 1.73080800  | 2.43923400  |
| H  | -0.29276300 | 2.40852000  | 2.21539900  |
| H  | -1.89506100 | 2.30663300  | 2.95898500  |
| H  | -0.75982500 | 0.96377600  | 3.13020300  |
| C  | -0.95239300 | 2.91726200  | -0.56135100 |
| H  | -0.49506500 | 2.81264100  | -1.54870800 |
| H  | -1.69580300 | 3.72171400  | -0.62426900 |
| H  | -0.18059000 | 3.22788200  | 0.14610700  |
| C  | -2.60525200 | 0.97078100  | -2.46792200 |
| H  | -2.79459400 | 0.02989700  | -2.98952000 |
| H  | -3.48317900 | 1.61453300  | -2.60631800 |
| H  | -1.75278100 | 1.46364000  | -2.94101800 |
| C  | -3.84519100 | -1.38822900 | -0.68210300 |
| H  | -3.73826700 | -2.28859300 | -0.07217900 |
| H  | -4.89255200 | -1.06872100 | -0.62212400 |
| H  | -3.63753200 | -1.65125300 | -1.72199100 |

|   |            |             |             |
|---|------------|-------------|-------------|
| C | 2.04381600 | 0.65324200  | 0.50851700  |
| O | 1.25538900 | -0.41609400 | -0.01615000 |
| C | 3.50485700 | 0.34811500  | 0.25903700  |
| C | 4.20797500 | -0.50498100 | 1.12201800  |
| C | 4.15850700 | 0.84905200  | -0.87504000 |
| C | 5.53438200 | -0.85169200 | 0.85771400  |
| H | 3.71110300 | -0.89570300 | 2.00697000  |
| C | 5.48632400 | 0.50595300  | -1.14268100 |
| H | 3.62393300 | 1.51438700  | -1.54894600 |
| C | 6.17603000 | -0.34764800 | -0.27774800 |
| H | 6.06759100 | -1.51239000 | 1.53555400  |
| H | 5.98118600 | 0.90335400  | -2.02444000 |
| H | 7.20802600 | -0.61601700 | -0.48493300 |

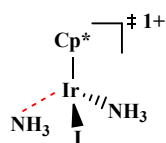

**TS<sub>2,3</sub>**

E=-618.743097(au)

|    |             |             |             |
|----|-------------|-------------|-------------|
| C  | 1.42829000  | 0.44208700  | 1.54952300  |
| C  | 0.85523000  | 1.58519300  | 0.91707400  |
| C  | 1.31281100  | 1.61233500  | -0.47050100 |
| C  | 2.29991300  | -0.23038200 | 0.58588500  |
| C  | 2.25635500  | 0.51792900  | -0.64828000 |
| Ir | 0.27806700  | -0.23731100 | -0.21674700 |
| N  | 0.02771300  | -1.48283200 | -2.01278600 |
| H  | -0.82103600 | -1.24838200 | -2.52549900 |
| H  | 0.81615600  | -1.41255300 | -2.65335700 |

|   |             |             |             |
|---|-------------|-------------|-------------|
| H | -0.05326300 | -2.44994200 | -1.70337200 |
| C | -0.03751900 | 2.60054500  | 1.55147300  |
| H | 0.57272800  | 3.43707300  | 1.91437400  |
| H | -0.76119300 | 3.00102300  | 0.83903200  |
| H | -0.57976700 | 2.18484700  | 2.40254800  |
| C | 1.22240900  | 0.01489100  | 2.96642400  |
| H | 1.30474500  | -1.06928800 | 3.07190700  |
| H | 1.99124100  | 0.47140500  | 3.60192900  |
| H | 0.24568300  | 0.32782200  | 3.34095100  |
| C | 3.17961400  | -1.40015900 | 0.87962700  |
| H | 3.38540400  | -1.98552400 | -0.01905100 |
| H | 4.13835600  | -1.03772900 | 1.27198200  |
| H | 2.73955800  | -2.05703800 | 1.63282300  |
| C | 3.06386700  | 0.25284900  | -1.87671100 |
| H | 2.52239000  | 0.54087700  | -2.78099700 |
| H | 3.98625800  | 0.84500000  | -1.83716900 |
| H | 3.34431700  | -0.79987900 | -1.95558500 |
| C | 1.01984200  | 2.69342800  | -1.45806900 |
| H | 0.00736800  | 3.08244200  | -1.32984800 |
| H | 1.72102000  | 3.52501600  | -1.31238400 |
| H | 1.12905000  | 2.33759200  | -2.48484900 |
| I | -2.76326100 | 0.07270100  | -0.01554700 |
| N | -0.05004200 | -3.04262300 | 0.76200600  |
| H | -0.97320400 | -3.36899400 | 1.03780300  |
| H | 0.51656300  | -2.99291900 | 1.60507600  |
| H | 0.36069800  | -3.76515700 | 0.17398600  |

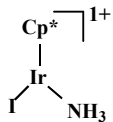

3

E=-562.1895602(au)

|    |             |             |             |
|----|-------------|-------------|-------------|
| C  | -1.16947300 | 1.63416400  | -0.39174100 |
| C  | -0.90689800 | 1.38789300  | 0.98891000  |
| C  | -1.61864700 | 0.17094200  | 1.37596100  |
| C  | -2.07411500 | 0.59096500  | -0.87250900 |
| C  | -2.38410500 | -0.28485200 | 0.22988900  |
| Ir | -0.23778600 | -0.35225800 | -0.18090200 |
| N  | 0.07775800  | -2.49642700 | -0.37614200 |
| H  | 0.71223300  | -2.82914200 | 0.34914600  |
| H  | -0.79210900 | -3.02231200 | -0.30163600 |
| H  | 0.50643100  | -2.72555700 | -1.27360700 |
| C  | -0.07632400 | 2.22171700  | 1.90838700  |
| H  | -0.73097100 | 2.90317200  | 2.46550700  |
| H  | 0.45647600  | 1.60518200  | 2.63542000  |
| H  | 0.65192700  | 2.82393200  | 1.36298300  |
| C  | -0.65909300 | 2.77287300  | -1.21424200 |
| H  | -0.46781900 | 2.46262100  | -2.24441000 |
| H  | -1.40629500 | 3.57530000  | -1.24060200 |
| H  | 0.26352500  | 3.18527500  | -0.80155800 |
| C  | -2.64699700 | 0.52385800  | -2.24810500 |
| H  | -2.99602500 | -0.48132000 | -2.49191500 |
| H  | -3.50409200 | 1.20622400  | -2.31518500 |
| H  | -1.91695700 | 0.83587800  | -2.99876700 |

|   |             |             |             |
|---|-------------|-------------|-------------|
| C | -3.34987800 | -1.42345600 | 0.21586100  |
| H | -3.05401900 | -2.20903200 | 0.91500600  |
| H | -4.34034600 | -1.06228800 | 0.51938000  |
| H | -3.44406100 | -1.85861000 | -0.78127700 |
| C | -1.67411600 | -0.39985200 | 2.75371900  |
| H | -0.73117300 | -0.25119600 | 3.28460100  |
| H | -2.46524400 | 0.10415900  | 3.32326400  |
| H | -1.90093100 | -1.46775600 | 2.73558400  |
| I | 2.68457600  | -0.02568300 | -0.05766600 |

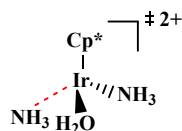

### TS<sub>2,4</sub>

E=-683.5756018 (au)

|    |             |             |             |
|----|-------------|-------------|-------------|
| C  | -2.37536600 | 1.67654400  | 0.85505100  |
| C  | -2.88859400 | 1.23488900  | -0.40103600 |
| C  | -3.81334300 | 0.11933000  | -0.15199200 |
| C  | -2.99234700 | 0.86115000  | 1.90732300  |
| C  | -3.84493300 | -0.13460000 | 1.26135700  |
| Ir | -4.59086900 | 1.89244200  | 0.88680100  |
| N  | -6.21967500 | 3.36524000  | -1.19103200 |
| H  | -6.40224000 | 2.44274900  | -1.58576900 |
| H  | -7.13369400 | 3.82155000  | -1.14802000 |
| H  | -4.21777000 | 4.65013800  | 1.33772100  |
| H  | -5.41979200 | 4.21707100  | 0.38178100  |
| N  | -6.53619000 | 1.81721500  | 1.85585000  |
| H  | -7.31743800 | 1.76393900  | 1.19974800  |



|   |             |             |             |
|---|-------------|-------------|-------------|
| H | -6.64103600 | 1.02598200  | 2.49141800  |
| H | -5.70338900 | 3.86351100  | -1.91799500 |
| H | -6.67508600 | 2.66739300  | 2.40827300  |
| C | -2.50266600 | 1.74298300  | -1.75213200 |
| H | -1.69792300 | 1.11282100  | -2.15276700 |
| H | -3.33079000 | 1.69378100  | -2.46236400 |
| H | -2.12804900 | 2.76728500  | -1.71836900 |
| C | -1.35594600 | 2.74652500  | 1.07947400  |
| H | -1.49801000 | 3.25769500  | 2.03429400  |
| H | -0.35895200 | 2.28824300  | 1.10602900  |
| H | -1.35054000 | 3.48644600  | 0.27692100  |
| C | -2.66190800 | 0.92337200  | 3.36014300  |
| H | -3.47355900 | 0.54753400  | 3.98563600  |
| H | -1.78365300 | 0.29004500  | 3.54791600  |
| H | -2.40885900 | 1.93497200  | 3.68314200  |
| C | -4.55027700 | -1.26077800 | 1.94738600  |
| H | -5.44288600 | -1.58017100 | 1.40586700  |
| H | -3.87388000 | -2.12346400 | 1.99687900  |
| H | -4.82596700 | -1.01384200 | 2.97513600  |
| C | -4.49632600 | -0.68512500 | -1.20888900 |
| H | -4.73716600 | -0.08863800 | -2.09131000 |
| H | -3.82007100 | -1.48574900 | -1.53713900 |
| H | -5.40868500 | -1.15957100 | -0.84279600 |
| O | -4.95632800 | 4.03065700  | 1.23071800  |

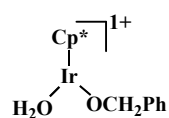

**H<sub>2</sub>O-5**

E=-916.6509058(au)

|    |             |             |             |
|----|-------------|-------------|-------------|
| C  | -1.64974900 | 0.93524900  | 1.32089700  |
| C  | -2.53630100 | -0.20297700 | 1.08458000  |
| C  | -2.97169600 | -0.16387900 | -0.28593100 |
| C  | -1.51408300 | 1.64514500  | 0.07222100  |
| C  | -2.31479200 | 0.94022000  | -0.92738200 |
| Ir | -0.73864900 | -0.34454100 | -0.13537400 |
| H  | 1.72656100  | 1.42610400  | 0.51036000  |
| H  | 1.90779000  | 0.23633800  | 1.81344500  |
| H  | -0.49687000 | -2.05576200 | -2.24641600 |
| H  | 0.70743900  | -2.22135800 | -1.29785400 |
| C  | -2.97032700 | -1.18511900 | 2.12356600  |
| H  | -3.83809200 | -0.78997600 | 2.66680100  |
| H  | -3.25938800 | -2.13920300 | 1.67756200  |
| H  | -2.17738400 | -1.36872900 | 2.85255400  |
| C  | -1.08861000 | 1.34389400  | 2.64474400  |
| H  | -0.16841000 | 1.92040500  | 2.52809200  |
| H  | -1.81440800 | 1.97177800  | 3.17641200  |
| H  | -0.87555000 | 0.47587400  | 3.27339600  |
| C  | -0.78393100 | 2.92889800  | -0.15194800 |
| H  | -0.32470500 | 2.95975800  | -1.14322400 |
| H  | -1.48810100 | 3.76760400  | -0.08320800 |
| H  | -0.00489200 | 3.08389900  | 0.59746400  |
| C  | -2.47361900 | 1.36241700  | -2.35183500 |
| H  | -2.76584400 | 0.52395800  | -2.98776800 |
| H  | -3.25375400 | 2.13036100  | -2.42645700 |
| H  | -1.54757000 | 1.78910600  | -2.74482300 |

|   |             |             |             |
|---|-------------|-------------|-------------|
| C | -3.89456900 | -1.14007500 | -0.94633300 |
| H | -3.86049800 | -2.11774700 | -0.45977400 |
| H | -4.92827500 | -0.77772800 | -0.89349200 |
| H | -3.64441100 | -1.27452600 | -2.00155000 |
| C | 2.03324200  | 0.39646100  | 0.73328600  |
| O | 1.21250600  | -0.53112400 | 0.01681900  |
| C | 3.48476100  | 0.20955600  | 0.35172100  |
| C | 4.26251800  | -0.78463400 | 0.96273900  |
| C | 4.06788300  | 1.00568400  | -0.64392700 |
| C | 5.59386300  | -0.97761000 | 0.58885400  |
| H | 3.82315800  | -1.40344900 | 1.74156800  |
| C | 5.40017800  | 0.81766000  | -1.01941000 |
| H | 3.47562700  | 1.78380000  | -1.11973900 |
| C | 6.16577200  | -0.17552500 | -0.40317900 |
| H | 6.18668200  | -1.74751800 | 1.07471900  |
| H | 5.84078200  | 1.44766500  | -1.78704900 |
| H | 7.20333200  | -0.32077900 | -0.69020600 |
| O | -0.26381900 | -2.28167600 | -1.33218800 |

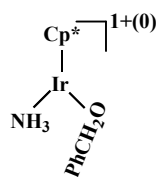

**5**

E=-896.7715878(au)

|   |            |             |             |
|---|------------|-------------|-------------|
| C | 1.55602800 | 1.73538000  | -0.01090400 |
| C | 2.32301900 | 0.90964400  | -0.95148300 |
| C | 2.95650800 | -0.14954400 | -0.20918100 |
| C | 1.67601000 | 1.14554700  | 1.28255700  |

|    |             |             |             |
|----|-------------|-------------|-------------|
| C  | 2.51487900  | -0.05119200 | 1.15659900  |
| Ir | 0.73867400  | -0.30475900 | -0.09048300 |
| N  | 0.49612300  | -2.27983800 | -0.98472300 |
| H  | 1.40303500  | -2.69651500 | -1.18784000 |
| H  | -0.00811100 | -2.91681600 | -0.36754600 |
| H  | -0.02691700 | -2.23741400 | -1.85971100 |
| C  | 2.52089300  | 1.21689700  | -2.39998200 |
| H  | 3.34016300  | 1.93811800  | -2.51505100 |
| H  | 2.78094400  | 0.32055200  | -2.96708200 |
| H  | 1.62371400  | 1.65906300  | -2.83969500 |
| C  | 0.83227800  | 2.99636700  | -0.35700700 |
| H  | 0.02409100  | 3.20069100  | 0.34859300  |
| H  | 1.52889000  | 3.84330400  | -0.32676600 |
| H  | 0.40944100  | 2.95085400  | -1.36362400 |
| C  | 1.10162000  | 1.65983500  | 2.56313700  |
| H  | 0.78709000  | 0.84172700  | 3.21629500  |
| H  | 1.85958800  | 2.24168600  | 3.10210400  |
| H  | 0.24280400  | 2.31056400  | 2.38582000  |
| C  | 2.93518200  | -0.92882500 | 2.29001200  |
| H  | 3.20743100  | -1.92776100 | 1.94248300  |
| H  | 3.81142200  | -0.49495100 | 2.78843400  |
| H  | 2.14177600  | -1.02383800 | 3.03523900  |
| C  | 3.87983200  | -1.18889000 | -0.76401900 |
| H  | 3.67642300  | -1.38341100 | -1.82008700 |
| H  | 4.91993900  | -0.85151800 | -0.68171800 |
| H  | 3.79333600  | -2.13286500 | -0.21953400 |
| O  | -1.25371600 | -0.14419500 | 0.15141200  |

|   |             |             |             |
|---|-------------|-------------|-------------|
| C | -2.20233700 | -1.10388000 | -0.30602600 |
| H | -2.03174800 | -1.35812400 | -1.36296700 |
| H | -2.13546100 | -2.03845900 | 0.27138400  |
| C | -3.59662000 | -0.52859700 | -0.16476600 |
| C | -4.45126000 | -0.93908200 | 0.86578400  |
| C | -4.03819600 | 0.46569600  | -1.05158200 |
| C | -5.72251300 | -0.37405900 | 1.00658700  |
| H | -4.12102600 | -1.70956200 | 1.55838600  |
| C | -5.30394500 | 1.03588100  | -0.91192100 |
| H | -3.38571900 | 0.78881800  | -1.85939400 |
| C | -6.15055900 | 0.61590500  | 0.11945000  |
| H | -6.37658800 | -0.70656200 | 1.80782200  |
| H | -5.63272800 | 1.80259200  | -1.60800200 |
| H | -7.13770400 | 1.05617300  | 0.22788000  |

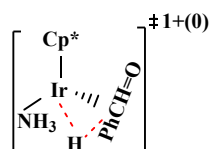

**TS<sub>6,7</sub>**

E=-896.7453053(au)

|    |             |             |             |
|----|-------------|-------------|-------------|
| C  | -1.00186900 | 0.82145200  | 1.27855100  |
| C  | -1.37903400 | -0.54498600 | 1.09948300  |
| C  | -1.64093800 | -0.74934300 | -0.32874700 |
| C  | -0.98925500 | 1.47319700  | -0.01639500 |
| C  | -1.44481100 | 0.51094700  | -0.99720700 |
| Ir | 0.46185000  | -0.22944300 | -0.13459400 |
| N  | 1.31192100  | -2.22613300 | -0.11806900 |
| H  | 0.58721700  | -2.92090600 | 0.05668100  |

|   |             |             |             |
|---|-------------|-------------|-------------|
| H | 1.77114400  | -2.47076300 | -0.99369300 |
| H | 2.00983700  | -2.30653000 | 0.62054600  |
| C | -1.58888300 | -1.57128900 | 2.16909100  |
| H | -2.64657700 | -1.60255600 | 2.45961500  |
| H | -1.31483600 | -2.57133000 | 1.82249400  |
| H | -1.00274900 | -1.34704100 | 3.06327900  |
| C | -0.63691200 | 1.47964300  | 2.57023400  |
| H | 0.17748600  | 2.19587400  | 2.43461000  |
| H | -1.50085400 | 2.03210900  | 2.96012500  |
| H | -0.33727800 | 0.74971800  | 3.32479500  |
| C | -0.73060400 | 2.92682800  | -0.26597900 |
| H | -0.34316000 | 3.09471700  | -1.27380300 |
| H | -1.66038700 | 3.50096300  | -0.16725200 |
| H | -0.01238800 | 3.33403200  | 0.44996600  |
| C | -1.71762400 | 0.79790400  | -2.44077600 |
| H | -1.62362300 | -0.10000600 | -3.05509500 |
| H | -2.74281100 | 1.17311600  | -2.54930200 |
| H | -1.04147700 | 1.55995200  | -2.83434400 |
| C | -2.19580900 | -2.00176300 | -0.93298500 |
| H | -1.80944900 | -2.89239700 | -0.43070400 |
| H | -3.28808300 | -2.01311500 | -0.83172600 |
| H | -1.95472300 | -2.07559700 | -1.99572600 |
| O | 2.48261000  | 0.29239700  | 0.56269700  |
| C | 2.61835000  | 0.58977100  | -0.71456700 |
| H | 2.40496600  | 1.62219200  | -1.02022100 |
| H | 1.42897300  | -0.05557800 | -1.49296600 |
| C | 3.68997800  | -0.06804700 | -1.52773000 |

|   |            |             |             |
|---|------------|-------------|-------------|
| C | 3.97304800 | 0.42403600  | -2.81036200 |
| C | 4.44356000 | -1.12996600 | -1.01040400 |
| C | 4.99016500 | -0.14810000 | -3.57254800 |
| H | 3.39518400 | 1.25662200  | -3.20437100 |
| C | 5.46489800 | -1.69762600 | -1.77346800 |
| H | 4.23927000 | -1.49259100 | -0.00835300 |
| C | 5.73714600 | -1.21174600 | -3.05541300 |
| H | 5.20517400 | 0.23729700  | -4.56474000 |
| H | 6.05060400 | -2.51646500 | -1.36619200 |
| H | 6.53211400 | -1.65551200 | -3.64744500 |

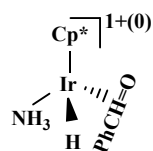

7

E=-896.7503022(au)

|    |             |             |             |
|----|-------------|-------------|-------------|
| C  | 2.57460100  | 0.58860200  | -0.81620300 |
| C  | 2.78361400  | -0.46947100 | 0.07722600  |
| C  | 2.01572400  | -0.19604800 | 1.30624400  |
| C  | 1.67691600  | 1.55460700  | -0.17541200 |
| C  | 1.44789400  | 1.13834600  | 1.17750000  |
| Ir | 0.33230100  | -0.29692200 | -0.05305100 |
| N  | -0.18092000 | -2.38349900 | -0.08193200 |
| H  | 0.65196100  | -2.96646100 | 0.00114100  |
| H  | -0.81833900 | -2.64019600 | 0.66891500  |
| H  | -0.63899100 | -2.60230200 | -0.96671500 |
| C  | 3.60496500  | -1.70130900 | -0.13496100 |
| H  | 4.53129600  | -1.64358700 | 0.45012700  |

|   |             |             |             |
|---|-------------|-------------|-------------|
| H | 3.07152300  | -2.59678500 | 0.20017600  |
| H | 3.87791700  | -1.83515200 | -1.18376700 |
| C | 3.11164400  | 0.74328500  | -2.20359800 |
| H | 2.33569100  | 1.09402300  | -2.89081100 |
| H | 3.91501300  | 1.49055900  | -2.21952300 |
| H | 3.51655400  | -0.19364200 | -2.59117100 |
| C | 1.30436800  | 2.87722400  | -0.77168900 |
| H | 0.47406700  | 3.34171100  | -0.23607300 |
| H | 2.16034100  | 3.56213000  | -0.72544200 |
| H | 1.02434500  | 2.77648500  | -1.82409500 |
| C | 0.85717300  | 1.96214900  | 2.28134300  |
| H | 0.40159700  | 1.33431600  | 3.04978500  |
| H | 1.65017600  | 2.55324400  | 2.75616600  |
| H | 0.10007000  | 2.65622200  | 1.90977100  |
| C | 2.16879800  | -0.97152200 | 2.58126700  |
| H | 2.19374900  | -2.04801200 | 2.39108900  |
| H | 3.10913000  | -0.70099600 | 3.07746700  |
| H | 1.35001900  | -0.76615000 | 3.27439000  |
| O | -0.84580300 | -0.32731500 | -1.89028600 |
| C | -1.47662800 | 0.55347100  | -1.16723500 |
| H | -1.22920800 | 1.61242700  | -1.31125700 |
| H | -0.73804900 | -0.28108800 | 1.09450300  |
| C | -2.80590200 | 0.29565400  | -0.56604900 |
| C | -3.45675200 | 1.34880700  | 0.09660100  |
| C | -3.43402200 | -0.95737600 | -0.65101400 |
| C | -4.70052600 | 1.14601800  | 0.69266000  |
| H | -2.97808200 | 2.32339300  | 0.15026100  |



|   |             |             |             |
|---|-------------|-------------|-------------|
| C | -4.68065500 | -1.15508800 | -0.05993200 |
| H | -2.94506900 | -1.76869300 | -1.18102900 |
| C | -5.31360200 | -0.10820000 | 0.61968300  |
| H | -5.19169100 | 1.96421300  | 1.21111600  |
| H | -5.16215700 | -2.12630000 | -0.12766800 |
| H | -6.28185700 | -0.26826800 | 1.08482300  |

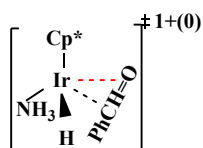

### TS<sub>7,8</sub>

E=-896.7498699(au)

|    |             |             |             |
|----|-------------|-------------|-------------|
| C  | -2.33222400 | 1.61905100  | 0.83643300  |
| C  | -2.81752400 | 1.16081200  | -0.39774200 |
| C  | -3.71377900 | 0.01682600  | -0.14251500 |
| C  | -2.87923500 | 0.76035200  | 1.89211800  |
| C  | -3.64035300 | -0.28595800 | 1.28251600  |
| Ir | -4.75072200 | 1.56695500  | 0.90396100  |
| N  | -5.95149600 | 2.54189000  | -0.59695700 |
| H  | -5.40375100 | 2.74237700  | -1.43351900 |
| H  | -6.75306200 | 1.98221600  | -0.87963500 |
| H  | -6.30324400 | 3.42724300  | -0.23289900 |
| C  | -2.52958700 | 1.70817800  | -1.75935100 |
| H  | -1.78904600 | 1.07644000  | -2.26589000 |
| H  | -3.42719400 | 1.71315100  | -2.38533900 |
| H  | -2.13218800 | 2.72447100  | -1.71635200 |
| C  | -1.43686400 | 2.79065100  | 1.09207600  |
| H  | -1.80616100 | 3.39451800  | 1.92651200  |

|   |             |             |             |
|---|-------------|-------------|-------------|
| H | -0.42812400 | 2.45188400  | 1.35903200  |
| H | -1.35323300 | 3.43462400  | 0.21413600  |
| C | -2.51082700 | 0.87447800  | 3.33913900  |
| H | -3.19385100 | 0.30785500  | 3.97530900  |
| H | -1.49847200 | 0.48275800  | 3.50026800  |
| H | -2.51390800 | 1.91692500  | 3.66997400  |
| C | -4.18214200 | -1.50963400 | 1.95626700  |
| H | -5.07691300 | -1.88068400 | 1.45233000  |
| H | -3.42796900 | -2.30605100 | 1.93288700  |
| H | -4.43122100 | -1.31518900 | 3.00179200  |
| C | -4.25603600 | -0.89326300 | -1.20310200 |
| H | -4.58012100 | -0.33335200 | -2.08410800 |
| H | -3.48098100 | -1.60057800 | -1.52432700 |
| H | -5.10640700 | -1.47115500 | -0.83354800 |
| O | -5.21310800 | 3.55087300  | 1.97195500  |
| C | -5.70613800 | 2.86117800  | 2.91825400  |
| H | -5.03530000 | 2.44287700  | 3.68131900  |
| H | -6.13534600 | 0.88226400  | 1.27869200  |
| C | -7.14309600 | 2.77757700  | 3.20737900  |
| C | -7.55706100 | 2.07698400  | 4.35260100  |
| C | -8.09842000 | 3.41429300  | 2.39512100  |
| C | -8.91091800 | 1.99811500  | 4.67363800  |
| H | -6.81312500 | 1.59873300  | 4.98431900  |
| C | -9.44851600 | 3.33306400  | 2.71948800  |
| H | -7.77401400 | 3.96937800  | 1.52095400  |
| C | -9.85691600 | 2.62314500  | 3.85613600  |
| H | -9.22852400 | 1.45448300  | 5.55801500  |

|   |              |            |            |
|---|--------------|------------|------------|
| H | -10.18726800 | 3.82268500 | 2.09226400 |
| H | -10.91233400 | 2.56199200 | 4.10450600 |

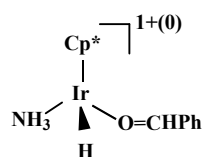

**8**

E=-896.7557096(au)

|    |             |             |             |
|----|-------------|-------------|-------------|
| C  | -1.23272700 | 0.97770000  | 1.47739300  |
| C  | -2.16385300 | -0.07370800 | 1.51297300  |
| C  | -2.90091300 | -0.07647500 | 0.23741900  |
| C  | -1.38600800 | 1.68947000  | 0.19861000  |
| C  | -2.48594100 | 1.09903000  | -0.51026000 |
| Ir | -0.88745500 | -0.38027000 | -0.44831200 |
| N  | -0.59330500 | -2.54014800 | -0.37120200 |
| H  | -0.99448200 | -2.93498300 | 0.47894100  |
| H  | -1.01203000 | -3.02719600 | -1.16026000 |
| H  | 0.40441500  | -2.75382000 | -0.37362200 |
| C  | -2.37835300 | -1.07978100 | 2.59994000  |
| H  | -3.30983100 | -0.86416000 | 3.13834100  |
| H  | -2.47302800 | -2.09144500 | 2.19178300  |
| H  | -1.56304700 | -1.07689200 | 3.32652000  |
| C  | -0.22920500 | 1.35617100  | 2.52072800  |
| H  | 0.75874900  | 1.52198600  | 2.07852100  |
| H  | -0.52239300 | 2.29498000  | 3.00715500  |
| H  | -0.13418100 | 0.59157800  | 3.29466800  |
| C  | -0.69688900 | 2.97563300  | -0.14631000 |
| H  | -0.67740000 | 3.14503900  | -1.22563100 |

|   |             |             |             |
|---|-------------|-------------|-------------|
| H | -1.21971200 | 3.82365900  | 0.31508200  |
| H | 0.33336300  | 2.99231600  | 0.22004300  |
| C | -3.13976200 | 1.63926600  | -1.74557900 |
| H | -3.58905200 | 0.84423900  | -2.34489000 |
| H | -3.93800300 | 2.33756300  | -1.46414100 |
| H | -2.42815300 | 2.18135400  | -2.37273900 |
| C | -4.10655100 | -0.92220700 | -0.04547100 |
| H | -3.97266600 | -1.94264200 | 0.32423400  |
| H | -4.99311000 | -0.50413000 | 0.44858900  |
| H | -4.31394800 | -0.97379000 | -1.11724900 |
| O | 1.34284800  | -0.55392000 | -0.50434300 |
| C | 2.16773300  | 0.37301600  | -0.43333800 |
| H | 1.83055000  | 1.41258700  | -0.53567400 |
| H | -0.88004900 | -0.59218500 | -2.03293800 |
| C | 3.59062500  | 0.15714200  | -0.21359400 |
| C | 4.43752200  | 1.27942200  | -0.17038100 |
| C | 4.12132200  | -1.13488200 | -0.02847900 |
| C | 5.80174000  | 1.11274100  | 0.05520400  |
| H | 4.01728200  | 2.27132200  | -0.31152100 |
| C | 5.48278200  | -1.29366400 | 0.19747300  |
| H | 3.45990700  | -1.99466100 | -0.06034800 |
| C | 6.32206300  | -0.17156600 | 0.23962700  |
| H | 6.45742100  | 1.97682800  | 0.08989000  |
| H | 5.89713400  | -2.28620900 | 0.34365000  |
| H | 7.38514000  | -0.30200800 | 0.41901900  |

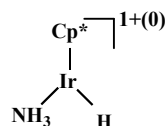

E=-551.313373(au)

|    |             |             |             |
|----|-------------|-------------|-------------|
| C  | -1.54040000 | -0.49309300 | 0.32266900  |
| C  | -1.38367700 | 0.60494800  | -0.58982600 |
| C  | -0.53549700 | 1.63431500  | 0.03695900  |
| C  | -0.61811000 | -0.24007400 | 1.41735000  |
| C  | -0.08404200 | 1.12663600  | 1.26278800  |
| Ir | 0.49318400  | -0.45397300 | -0.38752900 |
| N  | 2.65515200  | -0.46862600 | -0.79480900 |
| H  | 2.80905900  | -0.52244800 | -1.80264500 |
| H  | 3.15210400  | 0.34991500  | -0.44790400 |
| H  | 3.09064700  | -1.29430600 | -0.38637100 |
| C  | -2.10692000 | 0.78903200  | -1.88479900 |
| H  | -3.00360800 | 1.40137900  | -1.72486400 |
| H  | -1.48212500 | 1.30500100  | -2.61885500 |
| H  | -2.42348200 | -0.16723100 | -2.30678600 |
| C  | -2.49931700 | -1.63739400 | 0.19849400  |
| H  | -2.11910700 | -2.53408700 | 0.69330100  |
| H  | -3.45779000 | -1.37774000 | 0.66453100  |
| H  | -2.69274900 | -1.88448700 | -0.84800800 |
| C  | -0.47513700 | -1.07396800 | 2.64984600  |
| H  | 0.52423200  | -0.98136200 | 3.08228100  |
| H  | -1.19905600 | -0.74382600 | 3.40646700  |
| H  | -0.66650500 | -2.12873400 | 2.44003400  |
| C  | 0.79963100  | 1.79914700  | 2.26286600  |
| H  | 1.34852200  | 2.63535600  | 1.82490800  |
| H  | 0.19187100  | 2.19106200  | 3.08848700  |

|   |             |             |             |
|---|-------------|-------------|-------------|
| H | 1.51907200  | 1.09829800  | 2.69523400  |
| C | -0.24513600 | 2.97299400  | -0.56313700 |
| H | -0.06550300 | 2.89983300  | -1.63941000 |
| H | -1.10363700 | 3.64195200  | -0.42225300 |
| H | 0.62460800  | 3.44379900  | -0.09978200 |
| H | 0.52386200  | -1.99135200 | -0.87423300 |

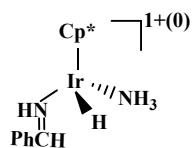

**10**

E=-876.8857589(au)

|    |             |             |             |
|----|-------------|-------------|-------------|
| C  | -2.95958000 | -0.26265600 | 0.17153100  |
| C  | -2.62177400 | 0.45941900  | -1.02763400 |
| C  | -1.70812200 | 1.51695200  | -0.66136100 |
| C  | -2.36616200 | 0.45514100  | 1.30704300  |
| C  | -1.61641400 | 1.53925400  | 0.80301000  |
| Ir | -0.77447500 | -0.43416100 | -0.18473900 |
| N  | -0.29138800 | -2.26519900 | 0.88720800  |
| H  | -0.59200600 | -3.09641800 | 0.38285600  |
| H  | 0.70798400  | -2.36697700 | 1.06549100  |
| H  | -0.76047000 | -2.27427600 | 1.79285500  |
| C  | -3.16852300 | 0.20045000  | -2.39924500 |
| H  | -4.07944000 | 0.79289700  | -2.55184700 |
| H  | -2.45490900 | 0.48159100  | -3.17683400 |
| H  | -3.42978900 | -0.85128500 | -2.53625800 |
| C  | -3.96691000 | -1.36828100 | 0.28982900  |
| H  | -3.71599200 | -2.05204200 | 1.10550600  |

|   |             |             |             |
|---|-------------|-------------|-------------|
| H | -4.96540800 | -0.96153500 | 0.49584500  |
| H | -4.02912200 | -1.95099500 | -0.63266900 |
| C | -2.55853900 | 0.06444000  | 2.73957300  |
| H | -1.82110500 | 0.53720200  | 3.39198400  |
| H | -3.55608400 | 0.36413700  | 3.08494100  |
| H | -2.48722200 | -1.02017000 | 2.87090700  |
| C | -0.83642700 | 2.55407100  | 1.58066700  |
| H | 0.14912300  | 2.72867900  | 1.13614400  |
| H | -1.36206300 | 3.51723400  | 1.58262800  |
| H | -0.69289700 | 2.24743100  | 2.61912900  |
| C | -1.18988500 | 2.59468400  | -1.56790200 |
| H | -1.07934800 | 2.23515600  | -2.59400200 |
| H | -1.87862300 | 3.44918500  | -1.58570700 |
| H | -0.21697500 | 2.96440300  | -1.23238900 |
| H | -0.45575100 | -1.31680800 | -1.47824300 |
| C | 2.31987400  | -0.67846900 | -0.35812900 |
| H | 2.17386300  | -1.69988400 | -0.70833700 |
| N | 1.25713800  | 0.02350700  | -0.14714100 |
| H | 1.43924900  | 0.98025200  | 0.16011700  |
| C | 3.70726700  | -0.25301800 | -0.16925100 |
| C | 4.71847200  | -1.18823800 | -0.45672400 |
| C | 4.07145500  | 1.02530900  | 0.29802000  |
| C | 6.06093500  | -0.85728400 | -0.28292000 |
| H | 4.44182400  | -2.17607400 | -0.81416400 |
| C | 5.41284600  | 1.35188900  | 0.46865700  |
| H | 3.31280000  | 1.76625600  | 0.53243300  |
| C | 6.41072200  | 0.41310700  | 0.18005500  |

|   |            |             |             |
|---|------------|-------------|-------------|
| H | 6.83141200 | -1.58885000 | -0.50569800 |
| H | 5.68403600 | 2.33901800  | 0.83012500  |
| H | 7.45580100 | 0.67350000  | 0.31828300  |

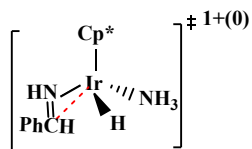

TS<sub>10,11</sub>

E=-876.8661455(au)

|    |             |             |             |
|----|-------------|-------------|-------------|
| C  | 0.84507000  | 1.84383000  | 0.39685300  |
| C  | 1.42319200  | 1.22243500  | -0.78884300 |
| C  | 1.90686000  | -0.06522500 | -0.39416200 |
| C  | 1.17584900  | 0.98854700  | 1.55147700  |
| C  | 1.80165500  | -0.17011400 | 1.06979600  |
| Ir | -0.32310300 | 0.11225300  | -0.08196800 |
| N  | -2.19532900 | 0.44596100  | 0.94271600  |
| H  | -2.70350400 | -0.43806300 | 0.95665200  |
| H  | -2.04595800 | 0.74564600  | 1.90603200  |
| H  | -2.77874000 | 1.14598600  | 0.48997600  |
| C  | 1.57329900  | 1.86113000  | -2.13608200 |
| H  | 2.52128800  | 2.41216600  | -2.17783300 |
| H  | 1.58403200  | 1.11653900  | -2.93529500 |
| H  | 0.76740800  | 2.57035100  | -2.33700000 |
| C  | 0.35487100  | 3.25624900  | 0.50182100  |
| H  | -0.39774500 | 3.35795200  | 1.28852500  |
| H  | 1.18573500  | 3.93004200  | 0.74741100  |
| H  | -0.08508100 | 3.59650800  | -0.43876800 |
| C  | 0.84479700  | 1.33847500  | 2.96821800  |



|   |             |             |             |
|---|-------------|-------------|-------------|
| H | 0.97802300  | 0.48830100  | 3.64031000  |
| H | 1.49301400  | 2.15144500  | 3.31830600  |
| H | -0.18765400 | 1.69183300  | 3.06180200  |
| C | 2.27451300  | -1.35305600 | 1.85574800  |
| H | 1.97098400  | -2.29202300 | 1.38206300  |
| H | 3.37044600  | -1.36193000 | 1.91000200  |
| H | 1.88856400  | -1.34423300 | 2.87720300  |
| C | 2.64402000  | -1.03991700 | -1.26150100 |
| H | 2.32652200  | -0.96860200 | -2.30407900 |
| H | 3.72238800  | -0.83738100 | -1.22478100 |
| H | 2.49264400  | -2.06891600 | -0.92551500 |
| H | -1.17700900 | 0.51524600  | -1.36392300 |
| C | -0.84280300 | -2.46656500 | -1.03843300 |
| H | 0.12122200  | -2.95236500 | -1.21797700 |
| N | -1.20975900 | -2.14197900 | 0.17633200  |
| H | -0.48500100 | -2.44583000 | 0.82996100  |
| C | -1.70527800 | -2.36147100 | -2.22165900 |
| C | -1.17419700 | -2.75203400 | -3.46233700 |
| C | -3.04324800 | -1.93075000 | -2.15112400 |
| C | -1.95415100 | -2.69263200 | -4.61722900 |
| H | -0.14573000 | -3.09952800 | -3.51471400 |
| C | -3.81946300 | -1.87501500 | -3.30401600 |
| H | -3.46409900 | -1.64404000 | -1.19283800 |
| C | -3.27663000 | -2.25151300 | -4.54011700 |
| H | -1.53238300 | -2.99264700 | -5.57166300 |
| H | -4.85137800 | -1.54198500 | -3.24518200 |
| H | -3.88758900 | -2.20632300 | -5.43683400 |

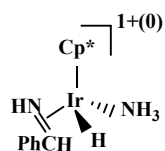

**11**

E=-876.871778(au)

|    |             |             |             |
|----|-------------|-------------|-------------|
| C  | 2.14139900  | -0.15401700 | 1.25970900  |
| C  | 1.66980400  | 1.20435000  | 1.05043700  |
| C  | 1.75087000  | 1.46917100  | -0.35997200 |
| C  | 2.67112100  | -0.63963800 | -0.02086100 |
| C  | 2.43645900  | 0.34510700  | -1.00139700 |
| Ir | 0.32631600  | -0.23018600 | 0.04265100  |
| N  | -0.33217800 | -2.27309300 | 0.19154400  |
| H  | -1.01929100 | -2.42592400 | 0.92652600  |
| H  | -0.75994000 | -2.53844100 | -0.69525700 |
| H  | 0.45610400  | -2.89563100 | 0.36593400  |
| C  | 1.26809700  | 2.17727900  | 2.11731900  |
| H  | 2.14663300  | 2.74724200  | 2.44402500  |
| H  | 0.52434400  | 2.88922000  | 1.75286800  |
| H  | 0.85728100  | 1.66705400  | 2.99094300  |
| C  | 2.38180500  | -0.81265800 | 2.58515700  |
| H  | 2.29425400  | -1.89993300 | 2.51273900  |
| H  | 3.39297000  | -0.58414300 | 2.94446400  |
| H  | 1.67211700  | -0.46286000 | 3.33843300  |
| C  | 3.34462600  | -1.96276800 | -0.20084300 |
| H  | 3.41364900  | -2.24545400 | -1.25319000 |
| H  | 4.36260600  | -1.92184200 | 0.20630800  |
| H  | 2.81707700  | -2.75621000 | 0.33735300  |
| C  | 2.81492100  | 0.30356500  | -2.44792600 |

|   |             |             |             |
|---|-------------|-------------|-------------|
| H | 2.01689000  | 0.69951400  | -3.08372800 |
| H | 3.70128400  | 0.92709800  | -2.62029900 |
| H | 3.04933400  | -0.71043200 | -2.77800600 |
| C | 1.42649200  | 2.76152700  | -1.04431900 |
| H | 0.72366500  | 3.35888500  | -0.45998400 |
| H | 2.34027900  | 3.35334500  | -1.17979300 |
| H | 0.99595300  | 2.59236800  | -2.03556300 |
| H | -0.74612600 | -0.01335300 | 1.18309500  |
| C | -1.50197900 | 0.59796700  | -1.13463700 |
| H | -1.29454500 | 1.66009000  | -1.27910200 |
| N | -0.83914400 | -0.32949100 | -1.85134200 |
| H | -0.17352100 | 0.13694700  | -2.47115000 |
| C | -2.82181900 | 0.30313900  | -0.52589800 |
| C | -3.49860100 | 1.32812800  | 0.15473800  |
| C | -3.44016400 | -0.95192400 | -0.65202600 |
| C | -4.75350100 | 1.09892400  | 0.71813300  |
| H | -3.03359300 | 2.30693500  | 0.24208000  |
| C | -4.69502000 | -1.17911100 | -0.08871200 |
| H | -2.94084800 | -1.74165300 | -1.20333900 |
| C | -5.35487500 | -0.15754200 | 0.60194400  |
| H | -5.26410800 | 1.90095700  | 1.24313100  |
| H | -5.16382600 | -2.15317300 | -0.19627900 |
| H | -6.33353400 | -0.33716900 | 1.03715200  |

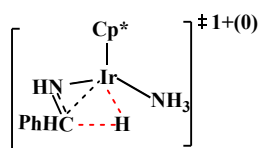

**TS<sub>11,12</sub>**

E=-876.8608919(au)

|    |             |             |             |
|----|-------------|-------------|-------------|
| C  | -1.39445500 | 0.74296900  | -0.94273900 |
| C  | -0.77665000 | 1.57961800  | 0.07021100  |
| C  | -0.85263600 | 0.87613500  | 1.33662600  |
| C  | -1.74294800 | -0.50679000 | -0.33746800 |
| C  | -1.40049600 | -0.42121800 | 1.08915300  |
| Ir | 0.45439500  | -0.27924900 | -0.12492200 |
| N  | 1.01732400  | -2.37617500 | -0.06514700 |
| H  | 1.85391800  | -2.60496700 | -0.60135700 |
| H  | 1.17767400  | -2.68051800 | 0.89438100  |
| H  | 0.25564100  | -2.94156400 | -0.43812600 |
| C  | -0.33760700 | 3.00079100  | -0.11225500 |
| H  | -1.17663900 | 3.68675400  | 0.05946800  |
| H  | 0.45465600  | 3.26476300  | 0.59279000  |
| H  | 0.03403000  | 3.17853300  | -1.12431500 |
| C  | -1.63685100 | 1.13876400  | -2.36600400 |
| H  | -1.66406400 | 0.27077500  | -3.02829700 |
| H  | -2.60387300 | 1.65104900  | -2.44561000 |
| H  | -0.86978200 | 1.82652800  | -2.72928500 |
| C  | -2.47207000 | -1.64663300 | -0.98020500 |
| H  | -2.13808100 | -2.61032000 | -0.58406800 |
| H  | -3.54911900 | -1.56840800 | -0.78578000 |
| H  | -2.32618200 | -1.65459500 | -2.06304500 |
| C  | -1.71573100 | -1.47105200 | 2.10952700  |
| H  | -1.06352200 | -1.39452200 | 2.98262100  |
| H  | -2.75186600 | -1.36195700 | 2.45417200  |
| H  | -1.61326500 | -2.47652900 | 1.69297800  |

|   |             |             |             |
|---|-------------|-------------|-------------|
| C | -0.44114900 | 1.43226400  | 2.66314600  |
| H | 0.41910700  | 2.09970600  | 2.57003300  |
| H | -1.26584900 | 2.01621100  | 3.09094100  |
| H | -0.19038600 | 0.64145300  | 3.37363000  |
| H | 1.44639500  | -0.26682200 | -1.51104600 |
| C | 2.63788800  | 0.27390600  | -0.87266000 |
| H | 2.51009600  | 1.30040500  | -1.21344800 |
| N | 2.50503900  | 0.11386200  | 0.49408700  |
| H | 2.92866000  | -0.77110600 | 0.77773600  |
| C | 3.62788100  | -0.48032400 | -1.71761000 |
| C | 3.91120000  | 0.01716500  | -2.99915100 |
| C | 4.28679300  | -1.63667100 | -1.27549700 |
| C | 4.82748700  | -0.63043400 | -3.82623600 |
| H | 3.40854000  | 0.91784700  | -3.34285500 |
| C | 5.20570000  | -2.28403300 | -2.10428600 |
| H | 4.09828300  | -2.03633600 | -0.28255700 |
| C | 5.47639000  | -1.78579400 | -3.38068200 |
| H | 5.03759100  | -0.23304800 | -4.81476700 |
| H | 5.71159200  | -3.17705000 | -1.74966800 |
| H | 6.19147200  | -2.29149100 | -4.02265900 |

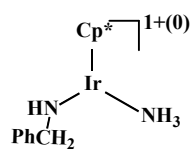

12

E=-876.8980341(au)

|   |            |            |            |
|---|------------|------------|------------|
| C | 1.38127300 | 0.17145500 | 1.70058400 |
| C | 0.65735200 | 1.27739900 | 1.07312700 |

|    |             |             |             |
|----|-------------|-------------|-------------|
| C  | 1.41181000  | 1.69161000  | -0.07220200 |
| C  | 2.59848900  | -0.04189600 | 0.96393900  |
| C  | 2.61343100  | 0.85970600  | -0.14735200 |
| Ir | 0.76604000  | -0.39373000 | -0.34460000 |
| N  | 1.13086800  | -2.47263600 | -0.91974000 |
| H  | 0.83639400  | -2.68705400 | -1.87239000 |
| H  | 2.12315800  | -2.69368000 | -0.85033900 |
| H  | 0.63693300  | -3.11470800 | -0.30048500 |
| C  | -0.57169300 | 1.93133900  | 1.62291000  |
| H  | -0.28863600 | 2.66713300  | 2.38611800  |
| H  | -1.13093900 | 2.45583100  | 0.84529500  |
| H  | -1.23674800 | 1.20435200  | 2.09501500  |
| C  | 0.99221400  | -0.49700300 | 2.98107800  |
| H  | 1.39217600  | -1.51164100 | 3.04461600  |
| H  | 1.38773300  | 0.07168500  | 3.83290200  |
| H  | -0.09357200 | -0.54708500 | 3.09314200  |
| C  | 3.65105000  | -1.05803600 | 1.28725600  |
| H  | 4.17381200  | -1.39552200 | 0.38881300  |
| H  | 4.39996500  | -0.62491800 | 1.96155800  |
| H  | 3.22560100  | -1.93251500 | 1.78555500  |
| C  | 3.70642400  | 1.01676500  | -1.15707600 |
| H  | 3.31143700  | 1.32103400  | -2.12949800 |
| H  | 4.41356200  | 1.78952000  | -0.82901700 |
| H  | 4.26705800  | 0.08856900  | -1.29039500 |
| C  | 1.10384800  | 2.84131400  | -0.97908500 |
| H  | 0.03532200  | 3.06802600  | -0.99030000 |
| H  | 1.63351700  | 3.73916700  | -0.63685900 |

|   |             |             |             |
|---|-------------|-------------|-------------|
| H | 1.42465100  | 2.63928200  | -2.00432700 |
| C | -1.95287500 | 0.32129800  | -1.55895900 |
| H | -2.27837600 | 0.27523800  | -2.60964300 |
| H | -1.58694300 | 1.33850900  | -1.39619200 |
| N | -0.85163200 | -0.60916800 | -1.36373200 |
| H | -1.05829100 | -1.52110900 | -1.76568200 |
| C | -3.17603200 | 0.09353100  | -0.67789300 |
| C | -4.01939300 | 1.17624300  | -0.38745300 |
| C | -3.51503400 | -1.17139400 | -0.18010200 |
| C | -5.17316100 | 1.00138700  | 0.37906900  |
| H | -3.76814200 | 2.16423100  | -0.76660200 |
| C | -4.66744500 | -1.34871500 | 0.59133400  |
| H | -2.87593100 | -2.02387800 | -0.39153300 |
| C | -5.50094200 | -0.26423200 | 0.87367000  |
| H | -5.81178100 | 1.85356200  | 0.59477400  |
| H | -4.91268700 | -2.33649800 | 0.97193500  |
| H | -6.39490800 | -0.40234300 | 1.47497000  |

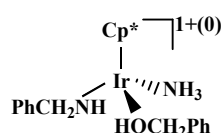

### 13

E=-1223.541006(au)

|   |             |            |             |
|---|-------------|------------|-------------|
| C | -2.70441500 | 2.02276100 | 0.78442400  |
| C | -3.06549300 | 1.46849700 | -0.48431300 |
| C | -3.87728500 | 0.28396700 | -0.23407500 |
| C | -3.17538000 | 1.12665700 | 1.83863400  |
| C | -3.89160100 | 0.06746300 | 1.21317900  |

|    |             |             |             |
|----|-------------|-------------|-------------|
| Ir | -4.92018000 | 1.95543700  | 0.62750200  |
| N  | -6.00463500 | 3.02178700  | -0.84703800 |
| H  | -6.94485800 | 3.16375400  | -0.47390100 |
| H  | -5.32102900 | 3.43763900  | 3.63556300  |
| H  | -3.97924700 | 4.36723500  | 2.93527600  |
| N  | -6.92340700 | 1.44638800  | 1.34223300  |
| H  | -7.53839900 | 1.17335600  | 0.57680300  |
| H  | -6.91213400 | 0.68189500  | 2.01564200  |
| H  | -7.33635400 | 2.26163300  | 1.79604800  |
| C  | -2.58660200 | 1.96636000  | -1.81247400 |
| H  | -1.54567100 | 1.65217400  | -1.96069600 |
| H  | -3.17276900 | 1.55792000  | -2.63717900 |
| H  | -2.61287600 | 3.05727500  | -1.87210000 |
| C  | -1.84254000 | 3.22846400  | 0.98973300  |
| H  | -2.04215800 | 3.71110000  | 1.94897300  |
| H  | -0.78618500 | 2.93080400  | 0.98491700  |
| H  | -1.98458000 | 3.96425300  | 0.19511100  |
| C  | -2.88964200 | 1.27672900  | 3.30078000  |
| H  | -3.64038200 | 0.76922700  | 3.91141300  |
| H  | -1.91327100 | 0.83752900  | 3.54223000  |
| H  | -2.85910100 | 2.32703700  | 3.59983500  |
| C  | -4.53714400 | -1.09626400 | 1.89719900  |
| H  | -5.44425200 | -1.41267200 | 1.37566800  |
| H  | -3.84793100 | -1.94963400 | 1.90498300  |
| H  | -4.79441300 | -0.86496000 | 2.93363400  |
| C  | -4.36041200 | -0.69300500 | -1.26175400 |
| H  | -4.58660400 | -0.19771000 | -2.20895000 |



|   |              |             |             |
|---|--------------|-------------|-------------|
| H | -3.59342300  | -1.45356000 | -1.45612300 |
| H | -5.26345800  | -1.20852000 | -0.92459500 |
| C | -5.06921600  | 4.27270300  | 2.97917700  |
| O | -5.57376600  | 3.92812400  | 1.66653700  |
| H | -5.22231700  | 4.58783900  | 1.00027000  |
| C | -6.17395300  | 2.44039200  | -2.19015100 |
| H | -5.18467400  | 2.33465800  | -2.64524200 |
| H | -6.61846100  | 1.43410600  | -2.15758100 |
| O | -4.72854500  | 5.25463400  | -0.46172800 |
| H | -5.25124700  | 4.39819300  | -0.77180800 |
| H | -5.33854700  | 5.98831100  | -0.62707500 |
| C | -7.03530100  | 3.32433500  | -3.07562300 |
| C | -8.30856200  | 2.91005100  | -3.48723000 |
| C | -6.57750400  | 4.58798400  | -3.48389900 |
| C | -9.10681800  | 3.73156500  | -4.28985200 |
| H | -8.67676100  | 1.93403200  | -3.17956000 |
| C | -7.37064100  | 5.41070200  | -4.28436600 |
| H | -5.59553300  | 4.92802300  | -3.16519500 |
| C | -8.63982000  | 4.98457700  | -4.69042800 |
| H | -10.09106700 | 3.39184500  | -4.60040600 |
| H | -6.99901200  | 6.38362000  | -4.59431800 |
| H | -9.25701800  | 5.62475200  | -5.31439100 |
| C | -5.69452000  | 5.55366200  | 3.47916600  |
| C | -6.70118500  | 5.52880800  | 4.45279800  |
| C | -5.28275000  | 6.79056700  | 2.95896700  |
| C | -7.28801900  | 6.71591300  | 4.89935500  |
| H | -7.02225100  | 4.57577400  | 4.86574100  |

|   |             |            |            |
|---|-------------|------------|------------|
| C | -5.87207500 | 7.97651600 | 3.39787000 |
| H | -4.50153100 | 6.81870500 | 2.20314100 |
| C | -6.87558100 | 7.94144400 | 4.37140400 |
| H | -8.06475500 | 6.68324200 | 5.65802100 |
| H | -5.54509100 | 8.92754100 | 2.98730700 |
| H | -7.33102100 | 8.86486600 | 4.71726800 |

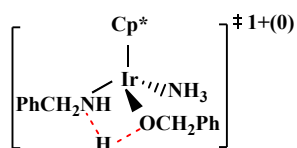

TS<sub>13,14</sub>

E=-1223.524619(au)

|    |             |            |             |
|----|-------------|------------|-------------|
| C  | -2.68013800 | 1.97047000 | 0.84712300  |
| C  | -3.03111600 | 1.45816400 | -0.44132200 |
| C  | -3.88611300 | 0.29473200 | -0.23937500 |
| C  | -3.22549800 | 1.08247300 | 1.86954300  |
| C  | -3.95481300 | 0.05551200 | 1.19961000  |
| Ir | -4.90495600 | 1.98369300 | 0.63598500  |
| N  | -5.99489100 | 3.05660100 | -0.86058200 |
| H  | -6.96471000 | 3.10289400 | -0.54432900 |
| H  | -5.14042900 | 3.50413200 | 3.64527300  |
| H  | -3.89072500 | 4.45784700 | 2.81790300  |
| N  | -6.91789400 | 1.49538800 | 1.33197500  |
| H  | -7.52636300 | 1.19093100 | 0.57305300  |
| H  | -6.91360100 | 0.75896800 | 2.03593800  |

|   |             |             |             |
|---|-------------|-------------|-------------|
| H | -7.33103700 | 2.32969400  | 1.74999600  |
| C | -2.49325500 | 1.95569100  | -1.74678700 |
| H | -1.46898300 | 1.58380700  | -1.87720800 |
| H | -3.08105700 | 1.59801000  | -2.59349300 |
| H | -2.45412800 | 3.04707600  | -1.78380200 |
| C | -1.76687800 | 3.12872100  | 1.09815400  |
| H | -1.96888700 | 3.60614800  | 2.05934200  |
| H | -0.72773900 | 2.77605500  | 1.11810300  |
| H | -1.84587900 | 3.88261700  | 0.31157100  |
| C | -2.97964600 | 1.19366700  | 3.34265100  |
| H | -3.76391000 | 0.69670100  | 3.91858000  |
| H | -2.02461500 | 0.72014400  | 3.60350800  |
| H | -2.92809300 | 2.23647600  | 3.66454900  |
| C | -4.66534200 | -1.09216300 | 1.84473400  |
| H | -5.53458600 | -1.40397200 | 1.26037800  |
| H | -3.98824900 | -1.95233200 | 1.91402400  |
| H | -4.99657900 | -0.84678100 | 2.85676000  |
| C | -4.36409700 | -0.64735500 | -1.30097400 |
| H | -4.53683400 | -0.12963900 | -2.24698700 |
| H | -3.61537900 | -1.42968600 | -1.47937600 |
| H | -5.29535900 | -1.13856800 | -1.00716100 |
| C | -4.97016800 | 4.32368600  | 2.94427400  |

|   |             |            |             |
|---|-------------|------------|-------------|
| O | -5.55693900 | 3.92473400 | 1.68398000  |
| H | -5.31197800 | 4.61443500 | 0.97037700  |
| C | -6.02943700 | 2.55875200 | -2.25076100 |
| H | -5.01792300 | 2.63126700 | -2.66029300 |
| H | -6.32159400 | 1.50162000 | -2.29163700 |
| O | -5.00087400 | 5.30876300 | -0.39743200 |
| H | -5.48000400 | 4.31510500 | -0.73772100 |
| H | -5.70095700 | 5.96950000 | -0.50340200 |
| C | -6.98422200 | 3.36290300 | -3.11447300 |
| C | -8.16692800 | 2.78715100 | -3.59682600 |
| C | -6.71148900 | 4.70373300 | -3.43211600 |
| C | -9.05769200 | 3.52721300 | -4.38027300 |
| H | -8.38942000 | 1.74944400 | -3.35948900 |
| C | -7.59849400 | 5.44551300 | -4.21329800 |
| H | -5.80365500 | 5.16763400 | -3.05551700 |
| C | -8.77531100 | 4.85870100 | -4.69050500 |
| H | -9.96932500 | 3.06315700 | -4.74635600 |
| H | -7.37225300 | 6.48097000 | -4.45252100 |
| H | -9.46485900 | 5.43618000 | -5.29964000 |
| C | -5.60631800 | 5.59725300 | 3.45134700  |
| C | -6.59376200 | 5.55980600 | 4.44449300  |
| C | -5.22965800 | 6.83827300 | 2.91495500  |

|   |             |            |            |
|---|-------------|------------|------------|
| C | -7.19616900 | 6.73803100 | 4.89351200 |
| H | -6.88725200 | 4.60367000 | 4.87077300 |
| C | -5.83289600 | 8.01579300 | 3.35821900 |
| H | -4.46644400 | 6.87627300 | 2.14179400 |
| C | -6.81749600 | 7.96793200 | 4.35002700 |
| H | -7.95758200 | 6.69563600 | 5.66710400 |
| H | -5.53212500 | 8.97011500 | 2.93537800 |
| H | -7.28435300 | 8.88469700 | 4.69843300 |

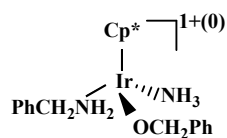

14

E=-1223.549002(au)

|    |             |            |             |
|----|-------------|------------|-------------|
| C  | -2.66614100 | 2.10594800 | 1.01906900  |
| C  | -2.92909600 | 1.70859100 | -0.33110500 |
| C  | -3.66347500 | 0.44902700 | -0.30480200 |
| C  | -3.26151100 | 1.11587400 | 1.90716300  |
| C  | -3.85149200 | 0.08998200 | 1.07503700  |
| Ir | -4.87535800 | 2.01574600 | 0.69651300  |
| N  | -6.01114400 | 3.03036700 | -0.87765300 |
| H  | -6.83377700 | 3.42589600 | -0.41895100 |
| H  | -5.50692600 | 3.29915100 | 3.60538300  |
| H  | -4.07375400 | 4.16095700 | 3.02696700  |
| N  | -6.86308200 | 1.45189100 | 1.38209200  |
| H  | -7.50197300 | 1.22028600 | 0.62210500  |
| H  | -6.84829400 | 0.66204500 | 2.02491800  |

|   |             |             |             |
|---|-------------|-------------|-------------|
| H | -7.23229400 | 2.26745100  | 1.87255300  |
| C | -2.44289500 | 2.40560300  | -1.56329000 |
| H | -1.48290700 | 1.97764800  | -1.87807900 |
| H | -3.14380200 | 2.28851200  | -2.39420100 |
| H | -2.29207600 | 3.47214300  | -1.38486200 |
| C | -1.84185800 | 3.28465600  | 1.43412100  |
| H | -1.98860300 | 3.52649300  | 2.48822700  |
| H | -0.77869000 | 3.05399600  | 1.29180100  |
| H | -2.07208100 | 4.17178800  | 0.83986100  |
| C | -3.11509000 | 1.06557800  | 3.39734800  |
| H | -3.94753800 | 0.53160400  | 3.86244300  |
| H | -2.19011200 | 0.54397100  | 3.67449600  |
| H | -3.07205700 | 2.06778000  | 3.83013200  |
| C | -4.51802000 | -1.15626800 | 1.56767000  |
| H | -5.26979800 | -1.51509900 | 0.86069400  |
| H | -3.77115400 | -1.95000100 | 1.69213400  |
| H | -4.99915500 | -1.00148400 | 2.53686700  |
| C | -3.99462400 | -0.40456700 | -1.49033800 |
| H | -4.09579400 | 0.19253800  | -2.39901000 |
| H | -3.19363100 | -1.13424200 | -1.66487200 |
| H | -4.92280600 | -0.96217500 | -1.34072200 |
| C | -5.16931600 | 4.10274600  | 2.93216500  |
| O | -5.55575800 | 3.83947600  | 1.59184900  |
| H | -4.75299900 | 4.88473800  | 0.54585500  |
| C | -6.44505800 | 2.29289700  | -2.09638900 |
| H | -5.54641000 | 1.93520300  | -2.60169700 |
| H | -7.02091100 | 1.42314000  | -1.76852500 |

|   |              |            |             |
|---|--------------|------------|-------------|
| O | -4.28581300  | 5.41394900 | -0.16173900 |
| H | -5.44087600  | 3.83984200 | -1.14003000 |
| H | -4.79211300  | 6.23680000 | -0.20862200 |
| C | -7.26528000  | 3.16235100 | -3.02449700 |
| C | -8.64651100  | 3.30683900 | -2.82879700 |
| C | -6.65110100  | 3.86806600 | -4.06855900 |
| C | -9.39793800  | 4.14240100 | -3.65728200 |
| H | -9.13339400  | 2.75826700 | -2.02588100 |
| C | -7.40096900  | 4.70317800 | -4.89983500 |
| H | -5.58194700  | 3.75781400 | -4.23223500 |
| C | -8.77596300  | 4.84314700 | -4.69455100 |
| H | -10.46749400 | 4.24345000 | -3.49667600 |
| H | -6.91300700  | 5.24078400 | -5.70781600 |
| H | -9.36063200  | 5.49086200 | -5.34139800 |
| C | -5.76441100  | 5.41797400 | 3.40427200  |
| C | -6.79332600  | 5.44718000 | 4.35407200  |
| C | -5.29328100  | 6.63590500 | 2.88658800  |
| C | -7.33875000  | 6.66132500 | 4.78329800  |
| H | -7.16581800  | 4.51193200 | 4.76551100  |
| C | -5.83894400  | 7.84913700 | 3.30749800  |
| H | -4.49899900  | 6.62660300 | 2.14504600  |
| C | -6.86265300  | 7.86542600 | 4.26084700  |
| H | -8.13313100  | 6.66569400 | 5.52453800  |
| H | -5.46187300  | 8.78263900 | 2.89867800  |
| H | -7.28368500  | 8.81010000 | 4.59308600  |

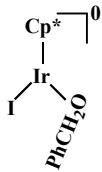

### I-5

E=-851.806322(au)

|    |             |             |             |
|----|-------------|-------------|-------------|
| C  | 1.19951900  | -2.09732000 | 0.95985000  |
| C  | 2.25739000  | -1.10718000 | 1.15820800  |
| C  | 2.82037800  | -0.78385100 | -0.12029200 |
| C  | 1.09850300  | -2.35553800 | -0.45844000 |
| C  | 2.07829600  | -1.50433200 | -1.12458800 |
| Ir | 0.61491800  | -0.29626400 | -0.04865500 |
| C  | 2.73294200  | -0.60772200 | 2.48433200  |
| H  | 3.51479600  | -1.27431300 | 2.87012800  |
| H  | 3.15648100  | 0.39582800  | 2.40662300  |
| H  | 1.92377500  | -0.58635900 | 3.21800300  |
| C  | 0.44359900  | -2.79518900 | 2.04345500  |
| H  | -0.52669100 | -3.14943400 | 1.68870200  |
| H  | 1.01401600  | -3.66616100 | 2.39003900  |
| H  | 0.28072800  | -2.13986000 | 2.90235900  |
| C  | 0.21917400  | -3.36817200 | -1.11848200 |
| H  | -0.08481400 | -3.04324000 | -2.11659100 |
| H  | 0.75860700  | -4.31748900 | -1.22476300 |
| H  | -0.68077800 | -3.55848700 | -0.52948300 |
| C  | 2.34192700  | -1.48089400 | -2.59495700 |
| H  | 2.73315700  | -0.51354500 | -2.91719500 |
| H  | 3.08814900  | -2.24585000 | -2.84540800 |
| H  | 1.43748700  | -1.69858300 | -3.16747000 |



|   |             |             |             |
|---|-------------|-------------|-------------|
| C | 3.97722500  | 0.13100700  | -0.37149200 |
| H | 4.04597900  | 0.91263500  | 0.38776000  |
| H | 4.91323000  | -0.44113800 | -0.34786600 |
| H | 3.90612000  | 0.61041100  | -1.35035400 |
| O | -1.40046600 | -0.33451500 | -0.13107600 |
| C | -2.24562700 | 0.80797800  | -0.22497300 |
| H | -2.02779500 | 1.53233600  | 0.57069900  |
| H | -2.10447700 | 1.32846500  | -1.18339600 |
| C | -3.68910700 | 0.36338900  | -0.10454700 |
| C | -4.45376500 | 0.07414200  | -1.24295500 |
| C | -4.27320300 | 0.19204000  | 1.15918500  |
| C | -5.77257100 | -0.37201800 | -1.12402700 |
| H | -4.01397000 | 0.20822400  | -2.22855500 |
| C | -5.58996600 | -0.25493200 | 1.28384900  |
| H | -3.69197100 | 0.42053600  | 2.04971900  |
| C | -6.34330600 | -0.53852500 | 0.14057900  |
| H | -6.35467400 | -0.58587500 | -2.01617600 |
| H | -6.03027100 | -0.37634900 | 2.26972200  |
| H | -7.36966700 | -0.88165200 | 0.23520700  |
| I | 0.85206000  | 2.69322700  | -0.01386700 |

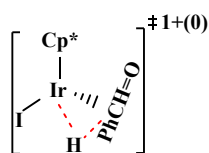

I-TS<sub>6,7</sub>

E=-851.7699946(au)

|   |             |             |             |
|---|-------------|-------------|-------------|
| C | -2.48374700 | -1.13283500 | -0.94981900 |
| C | -2.72348300 | 0.22454900  | -0.56808600 |

|    |             |             |             |
|----|-------------|-------------|-------------|
| C  | -2.49110200 | 0.32368100  | 0.87383600  |
| C  | -2.06519700 | -1.87457000 | 0.23035000  |
| C  | -2.10963400 | -0.96762300 | 1.36437800  |
| Ir | -0.58521000 | -0.29107100 | -0.08725500 |
| C  | -3.24031300 | 1.32451000  | -1.44146000 |
| H  | -4.33433900 | 1.38212500  | -1.37351300 |
| H  | -2.83903100 | 2.29489100  | -1.13988800 |
| H  | -2.98031700 | 1.15962400  | -2.48982900 |
| C  | -2.63399600 | -1.71010800 | -2.32005900 |
| H  | -1.90479200 | -2.50288200 | -2.50320300 |
| H  | -3.63371700 | -2.14967000 | -2.42665000 |
| H  | -2.51961900 | -0.94740500 | -3.09330200 |
| C  | -1.82494800 | -3.34893200 | 0.30338500  |
| H  | -1.13965200 | -3.60079500 | 1.11620900  |
| H  | -2.77115200 | -3.87201000 | 0.49226900  |
| H  | -1.41095500 | -3.73678100 | -0.63037000 |
| C  | -1.89398400 | -1.33204500 | 2.80048900  |
| H  | -1.47357800 | -0.49687400 | 3.36544400  |
| H  | -2.85213700 | -1.59944300 | 3.26322100  |
| H  | -1.22295500 | -2.18750600 | 2.90111800  |
| C  | -2.76937000 | 1.53199000  | 1.71033200  |
| H  | -2.61720400 | 2.45525400  | 1.14912800  |
| H  | -3.81632700 | 1.50703800  | 2.03894300  |
| H  | -2.14004900 | 1.56301500  | 2.60216100  |
| O  | 0.90964500  | -0.74167100 | -1.61283300 |
| C  | 1.47426000  | -1.36069200 | -0.59888900 |
| H  | 1.17414100  | -2.39881000 | -0.40549500 |

|   |            |             |             |
|---|------------|-------------|-------------|
| H | 0.82694000 | -0.73052800 | 0.72621100  |
| C | 2.89998400 | -1.09301800 | -0.24481600 |
| C | 3.53011900 | -1.91055500 | 0.70519100  |
| C | 3.63891100 | -0.10860900 | -0.91351500 |
| C | 4.88356300 | -1.74075300 | 0.99008600  |
| H | 2.95612000 | -2.68265100 | 1.21190400  |
| C | 4.99734500 | 0.05089500  | -0.63549000 |
| H | 3.15099300 | 0.50929100  | -1.65944400 |
| C | 5.62053900 | -0.76069400 | 0.31683900  |
| H | 5.36569700 | -2.37700800 | 1.72629900  |
| H | 5.57203300 | 0.80441000  | -1.16592300 |
| H | 6.67833400 | -0.63642300 | 0.52909400  |
| I | 0.62003600 | 2.45090300  | 0.10661200  |

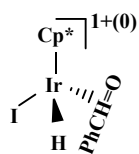

I-7

E=-851.7786128(au)

|    |             |             |             |
|----|-------------|-------------|-------------|
| C  | -2.60249600 | -1.05402600 | -0.85243500 |
| C  | -2.83402800 | -0.12725600 | 0.16730000  |
| C  | -2.02479500 | -0.50721100 | 1.34372200  |
| C  | -1.64255200 | -2.04040400 | -0.34989100 |
| C  | -1.40207800 | -1.78629400 | 1.05125000  |
| Ir | -0.36464300 | -0.22276900 | -0.02476400 |
| C  | -3.74468000 | 1.05609300  | 0.13390100  |
| H  | -4.68431000 | 0.81097300  | 0.64612800  |
| H  | -3.30731100 | 1.91125600  | 0.65525700  |

|   |             |             |             |
|---|-------------|-------------|-------------|
| H | -3.98928100 | 1.35842400  | -0.88651100 |
| C | -3.16706100 | -1.06573600 | -2.23794200 |
| H | -2.38432300 | -1.24722500 | -2.98100500 |
| H | -3.90542500 | -1.87029800 | -2.34517700 |
| H | -3.66095000 | -0.12288700 | -2.48186800 |
| C | -1.24078300 | -3.26367900 | -1.11205000 |
| H | -0.41416200 | -3.79058600 | -0.63233500 |
| H | -2.09245600 | -3.95324600 | -1.16877800 |
| H | -0.95298400 | -3.01650900 | -2.13796900 |
| C | -0.76694200 | -2.72670400 | 2.02883500  |
| H | -0.36751300 | -2.19387400 | 2.89422700  |
| H | -1.51579000 | -3.44302000 | 2.38971200  |
| H | 0.04596300  | -3.29520200 | 1.57096400  |
| C | -2.19225200 | 0.09302800  | 2.70806700  |
| H | -2.27692000 | 1.18131900  | 2.65804300  |
| H | -3.10552500 | -0.29274000 | 3.17867100  |
| H | -1.34959000 | -0.15420200 | 3.35759600  |
| O | 0.88218300  | -0.25440600 | -1.91862400 |
| C | 1.45512000  | -1.11809400 | -1.14321800 |
| H | 1.18262700  | -2.17605300 | -1.24189100 |
| H | 0.72297600  | -0.24367300 | 1.10574600  |
| C | 2.78868900  | -0.88349800 | -0.53563900 |
| C | 3.40030900  | -1.93201400 | 0.16965300  |
| C | 3.46343400  | 0.34004300  | -0.67244100 |
| C | 4.65350800  | -1.75371800 | 0.75382800  |
| H | 2.88488900  | -2.88502100 | 0.26131800  |
| C | 4.71783400  | 0.51477600  | -0.09006500 |

|   |            |             |             |
|---|------------|-------------|-------------|
| H | 3.00210900 | 1.14510300  | -1.23453400 |
| C | 5.31332900 | -0.52725900 | 0.62933900  |
| H | 5.11649600 | -2.56875800 | 1.30232200  |
| H | 5.23482800 | 1.46407000  | -0.19677500 |
| H | 6.28915500 | -0.38578600 | 1.08472000  |
| I | 0.10377800 | 2.71034200  | -0.00934600 |

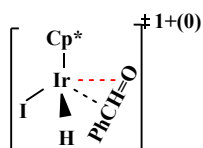

I-TS<sub>7,8</sub>

E=-851.775776(au)

|    |             |             |             |
|----|-------------|-------------|-------------|
| C  | -2.60331400 | -1.15562500 | -0.90603000 |
| C  | -2.92590500 | -0.12735600 | -0.02526700 |
| C  | -2.18595300 | -0.35030100 | 1.23948400  |
| C  | -1.66585800 | -2.06421600 | -0.22444900 |
| C  | -1.54509000 | -1.65293900 | 1.15103400  |
| Ir | -0.43901100 | -0.21951500 | 0.00318400  |
| C  | -3.83782900 | 1.03337200  | -0.26172200 |
| H  | -4.79269800 | 0.86980900  | 0.25460100  |
| H  | -3.41521900 | 1.96114700  | 0.13432300  |
| H  | -4.05254900 | 1.17716400  | -1.32295300 |
| C  | -3.05173100 | -1.33850000 | -2.32212100 |
| H  | -2.20435900 | -1.55532900 | -2.98041800 |
| H  | -3.74223000 | -2.18779200 | -2.40000300 |
| H  | -3.56452800 | -0.45352400 | -2.70480400 |
| C  | -1.19936300 | -3.36205000 | -0.80826600 |
| H  | -0.37561100 | -3.79122100 | -0.23400200 |

|   |             |             |             |
|---|-------------|-------------|-------------|
| H | -2.02181200 | -4.08934300 | -0.81173700 |
| H | -0.87135800 | -3.23656700 | -1.84418800 |
| C | -1.00609800 | -2.46493400 | 2.28944200  |
| H | -0.62362600 | -1.82707700 | 3.08924800  |
| H | -1.80837300 | -3.08544100 | 2.70858900  |
| H | -0.20189000 | -3.13003200 | 1.96628600  |
| C | -2.45659600 | 0.40414800  | 2.50710900  |
| H | -2.55108300 | 1.47694600  | 2.32144500  |
| H | -3.39617500 | 0.05849900  | 2.95747600  |
| H | -1.65851400 | 0.25379500  | 3.23791300  |
| O | 1.08570500  | -0.30760800 | -1.87601800 |
| C | 1.72803200  | -1.14800400 | -1.19059300 |
| H | 1.39478400  | -2.19567400 | -1.16449000 |
| H | 0.73988400  | -0.32259000 | 1.04265100  |
| C | 3.02944800  | -0.88483400 | -0.55865400 |
| C | 3.64969700  | -1.92585300 | 0.15230700  |
| C | 3.66457300  | 0.36467100  | -0.66403400 |
| C | 4.88029700  | -1.71557500 | 0.77072400  |
| H | 3.15794100  | -2.89273100 | 0.22109700  |
| C | 4.89631400  | 0.56918500  | -0.04882600 |
| H | 3.18804800  | 1.16017500  | -1.22699200 |
| C | 5.50194300  | -0.46702000 | 0.67300900  |
| H | 5.35433000  | -2.51936400 | 1.32556000  |
| H | 5.38848800  | 1.53381500  | -0.12723600 |
| H | 6.46030400  | -0.30086000 | 1.15621600  |
| I | 0.10337800  | 2.64480600  | -0.02782100 |

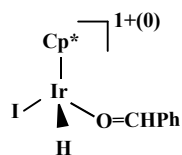

I-8

E=-851.7802119(au)

|    |             |             |             |
|----|-------------|-------------|-------------|
| C  | 0.76499800  | -1.90941400 | 1.37534100  |
| C  | 1.82983900  | -1.03029700 | 1.59669200  |
| C  | 2.62245600  | -0.94386500 | 0.35244100  |
| C  | 0.85773300  | -2.41082300 | -0.00920800 |
| C  | 2.09727500  | -1.91386100 | -0.57923600 |
| Ir | 0.70670300  | -0.30615700 | -0.44068900 |
| C  | 2.14326600  | -0.26575300 | 2.84346300  |
| H  | 3.00332600  | -0.71525600 | 3.35620100  |
| H  | 2.40703700  | 0.77175000  | 2.61904200  |
| H  | 1.30246700  | -0.26318200 | 3.54061800  |
| C  | -0.34216400 | -2.27169300 | 2.31260900  |
| H  | -1.31888100 | -2.18426100 | 1.82400400  |
| H  | -0.24015400 | -3.31471800 | 2.63730200  |
| H  | -0.34688700 | -1.63928700 | 3.20294000  |
| C  | 0.04039200  | -3.54190200 | -0.55444400 |
| H  | 0.04879500  | -3.55205100 | -1.64703000 |
| H  | 0.44781400  | -4.50081800 | -0.20710300 |
| H  | -0.99860300 | -3.48868500 | -0.21878500 |
| C  | 2.75890500  | -2.40478700 | -1.83064400 |
| H  | 3.38318800  | -1.63134500 | -2.28372200 |
| H  | 3.40274600  | -3.26145800 | -1.59436400 |
| H  | 2.02599500  | -2.73208200 | -2.57173200 |

|   |             |             |             |
|---|-------------|-------------|-------------|
| C | 3.94610100  | -0.24891400 | 0.24096800  |
| H | 3.94517800  | 0.70412700  | 0.77527000  |
| H | 4.73769300  | -0.87315300 | 0.67596000  |
| H | 4.20753300  | -0.05427400 | -0.80189400 |
| O | -1.47522000 | 0.20780200  | -0.47162500 |
| C | -2.42133300 | -0.59695000 | -0.48693400 |
| H | -2.23304500 | -1.65815700 | -0.69575300 |
| H | 0.78516700  | -0.06012200 | -2.02263400 |
| C | -3.80112000 | -0.20712000 | -0.23075600 |
| C | -4.79258600 | -1.20447500 | -0.25004600 |
| C | -4.14802000 | 1.12808700  | 0.05474300  |
| C | -6.11858200 | -0.87144400 | 0.01606100  |
| H | -4.51426100 | -2.23161600 | -0.46904300 |
| C | -5.47295100 | 1.45367500  | 0.31678900  |
| H | -3.37479900 | 1.88922300  | 0.06915500  |
| C | -6.45664700 | 0.45500700  | 0.29920600  |
| H | -6.88584500 | -1.63888000 | 0.00479500  |
| H | -5.74655600 | 2.48040600  | 0.53860800  |
| H | -7.49008300 | 0.71532800  | 0.50816300  |
| I | 1.12815900  | 2.82749800  | -0.04407900 |

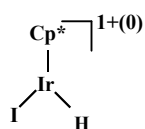

I-9

E=-506.3455846(au)

|   |             |            |             |
|---|-------------|------------|-------------|
| C | -1.46792300 | 1.49891800 | -0.49612000 |
| C | -1.27237700 | 1.39776800 | 0.88455100  |



|    |             |             |             |
|----|-------------|-------------|-------------|
| C  | -1.64949700 | 0.03150100  | 1.29253400  |
| C  | -1.99551800 | 0.21084800  | -0.98866300 |
| C  | -2.24998800 | -0.64125400 | 0.15264600  |
| Ir | -0.14784100 | -0.46037800 | -0.13673700 |
| C  | -0.74427700 | 2.43885200  | 1.81884200  |
| H  | -1.56557700 | 2.86197100  | 2.41149400  |
| H  | -0.02461700 | 2.01388000  | 2.52397200  |
| H  | -0.25862600 | 3.25819600  | 1.28492900  |
| C  | -1.18978300 | 2.67154300  | -1.38020100 |
| H  | -0.67999000 | 2.36653700  | -2.29892000 |
| H  | -2.13331700 | 3.14614600  | -1.67846000 |
| H  | -0.57775400 | 3.42486800  | -0.88031500 |
| C  | -2.44809100 | -0.03439400 | -2.39337100 |
| H  | -2.50806400 | -1.10331200 | -2.61059100 |
| H  | -3.44384400 | 0.39942000  | -2.55244800 |
| H  | -1.76713600 | 0.42524400  | -3.11472100 |
| C  | -3.02990900 | -1.91924200 | 0.17031500  |
| H  | -2.68429400 | -2.58656900 | 0.96356800  |
| H  | -4.09257600 | -1.71040600 | 0.34603600  |
| H  | -2.94554900 | -2.44962000 | -0.78120400 |
| C  | -1.69739100 | -0.44239800 | 2.71097500  |
| H  | -0.84472600 | -0.06946600 | 3.28438400  |
| H  | -2.61164100 | -0.07678000 | 3.19678900  |
| H  | -1.70165700 | -1.53336900 | 2.76700600  |
| H  | 0.09535400  | -2.03228300 | -0.37995700 |
| I  | 2.74710000  | -0.04072000 | -0.04871500 |

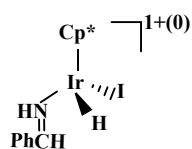

I-10

E=-831.9086103(au)

|    |             |             |             |
|----|-------------|-------------|-------------|
| C  | 2.88950900  | -0.45133900 | 0.05891600  |
| C  | 2.46392000  | -1.41081400 | -0.91157000 |
| C  | 1.46557700  | -2.25792000 | -0.27162800 |
| C  | 2.29066600  | -0.80653200 | 1.35592000  |
| C  | 1.44139800  | -1.90726600 | 1.15718700  |
| Ir | 0.67755000  | -0.24724400 | -0.35046500 |
| C  | 3.00664500  | -1.58754900 | -2.29746400 |
| H  | 3.83620800  | -2.30588000 | -2.27918300 |
| H  | 2.24831800  | -1.97533800 | -2.98136300 |
| H  | 3.38779100  | -0.64852000 | -2.70508000 |
| C  | 3.97256700  | 0.56961900  | -0.12048300 |
| H  | 3.80567300  | 1.44624600  | 0.50982300  |
| H  | 4.94416000  | 0.14126400  | 0.15904200  |
| H  | 4.04321800  | 0.90465700  | -1.15800800 |
| C  | 2.58581900  | -0.10314500 | 2.64386400  |
| H  | 1.83920300  | -0.32961400 | 3.40845000  |
| H  | 3.56538900  | -0.41272000 | 3.03052300  |
| H  | 2.61942900  | 0.98144300  | 2.50879900  |
| C  | 0.62109400  | -2.62359800 | 2.18428900  |
| H  | -0.36809900 | -2.88693200 | 1.79555900  |
| H  | 1.11082200  | -3.56196500 | 2.47381900  |
| H  | 0.48653000  | -2.02421900 | 3.08742400  |

|   |             |             |             |
|---|-------------|-------------|-------------|
| C | 0.86722300  | -3.50241900 | -0.85649800 |
| H | 0.74201700  | -3.41218300 | -1.93838600 |
| H | 1.51614700  | -4.36703100 | -0.66440900 |
| H | -0.11072100 | -3.71994500 | -0.41845400 |
| H | 0.29490100  | 0.10673600  | -1.85735600 |
| C | -2.40070400 | 0.07045500  | -0.54942500 |
| H | -2.20335500 | 0.82356800  | -1.30976200 |
| N | -1.37100400 | -0.50440100 | -0.02586000 |
| H | -1.59048200 | -1.20975800 | 0.67837100  |
| C | -3.80699600 | -0.17498900 | -0.23141100 |
| C | -4.76750200 | 0.58552300  | -0.92379800 |
| C | -4.23877500 | -1.11616900 | 0.72415600  |
| C | -6.12665100 | 0.41229300  | -0.67065100 |
| H | -4.43737200 | 1.31301300  | -1.66008400 |
| C | -5.59702400 | -1.28708700 | 0.97204500  |
| H | -3.52042900 | -1.71530700 | 1.27626400  |
| C | -6.54397700 | -0.52488500 | 0.27713600  |
| H | -6.85734200 | 1.00577800  | -1.21140200 |
| H | -5.92157800 | -2.01439900 | 1.70986700  |
| H | -7.60243000 | -0.66226600 | 0.47695700  |
| I | 0.50681100  | 2.71296000  | 0.16965800  |

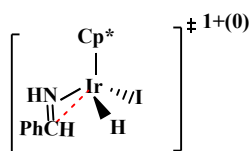

I-TS<sub>10,11</sub>

E=-831.8846258(au)

|   |             |             |            |
|---|-------------|-------------|------------|
| C | -2.14311600 | -0.45377500 | 1.19696400 |
|---|-------------|-------------|------------|

|    |             |             |             |
|----|-------------|-------------|-------------|
| C  | -1.31516100 | -1.63980300 | 1.32780900  |
| C  | -1.24854600 | -2.25263400 | 0.02455900  |
| C  | -2.74279100 | -0.47163600 | -0.15250100 |
| C  | -2.18734500 | -1.54400700 | -0.85970600 |
| Ir | -0.35175800 | -0.21087200 | 0.02243900  |
| C  | -0.73437000 | -2.18337500 | 2.60038700  |
| H  | -1.44173400 | -2.87430300 | 3.07732700  |
| H  | 0.19602300  | -2.72545000 | 2.41661400  |
| H  | -0.51634800 | -1.38236100 | 3.30939000  |
| C  | -2.61331700 | 0.42769400  | 2.31568800  |
| H  | -2.76048000 | 1.45256600  | 1.96901100  |
| H  | -3.56411300 | 0.05910100  | 2.72359200  |
| H  | -1.88431200 | 0.45878200  | 3.12825700  |
| C  | -3.74319900 | 0.53380200  | -0.63130800 |
| H  | -3.95570300 | 0.42250000  | -1.69681100 |
| H  | -4.68876400 | 0.41987400  | -0.08637500 |
| H  | -3.37914400 | 1.55242400  | -0.46423300 |
| C  | -2.45948700 | -1.93630100 | -2.28176700 |
| H  | -1.53814800 | -2.20192200 | -2.81214600 |
| H  | -3.11245500 | -2.81728000 | -2.32767400 |
| H  | -2.94384200 | -1.13183600 | -2.83888600 |
| C  | -0.61541700 | -3.57663500 | -0.29409000 |
| H  | 0.24944700  | -3.77015900 | 0.34430500  |
| H  | -1.33236600 | -4.39489000 | -0.14145000 |
| H  | -0.28419300 | -3.62942100 | -1.33526400 |
| H  | 0.85051500  | 0.04103700  | 1.00022300  |
| C  | 1.85496500  | -1.00698300 | -1.40740100 |

|   |             |             |             |
|---|-------------|-------------|-------------|
| H | 1.86307100  | -2.05253600 | -1.74491400 |
| N | 0.94083100  | -0.17209200 | -1.83538300 |
| H | 0.33733400  | -0.62005800 | -2.52338500 |
| C | 3.03170000  | -0.61821100 | -0.62656600 |
| C | 3.93734300  | -1.61721800 | -0.23497700 |
| C | 3.31054000  | 0.72769600  | -0.32287600 |
| C | 5.09479400  | -1.28674000 | 0.46802800  |
| H | 3.73021600  | -2.65586500 | -0.48302500 |
| C | 4.46775000  | 1.05208900  | 0.37475900  |
| H | 2.60540800  | 1.49408100  | -0.62659300 |
| C | 5.35998300  | 0.04897000  | 0.77450900  |
| H | 5.78788500  | -2.06591600 | 0.77110500  |
| H | 4.67788400  | 2.09089000  | 0.61112200  |
| H | 6.26222200  | 0.31129400  | 1.31979600  |
| I | -0.34310900 | 2.57063400  | -0.11507800 |

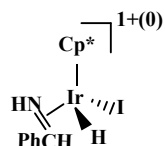

I-11

E=-831.8951173(au)

|    |             |             |             |
|----|-------------|-------------|-------------|
| C  | -2.17391900 | -0.27408000 | 1.24689200  |
| C  | -1.57053200 | -1.58443200 | 1.20490800  |
| C  | -1.66013000 | -2.04198500 | -0.16845800 |
| C  | -2.80630300 | -0.02911400 | -0.05986400 |
| C  | -2.48821600 | -1.09258000 | -0.91919700 |
| Ir | -0.34171000 | -0.27390100 | -0.02778900 |
| C  | -1.08605100 | -2.38325900 | 2.37647900  |

|   |             |             |             |
|---|-------------|-------------|-------------|
| H | -1.91777400 | -2.96750900 | 2.78984300  |
| H | -0.29752800 | -3.08198600 | 2.08897900  |
| H | -0.70259100 | -1.73844500 | 3.17010700  |
| C | -2.44118900 | 0.54108200  | 2.47624500  |
| H | -2.45415600 | 1.61029700  | 2.25118300  |
| H | -3.42019800 | 0.27906500  | 2.89739900  |
| H | -1.68716600 | 0.36364600  | 3.24636900  |
| C | -3.65092300 | 1.16309800  | -0.37141600 |
| H | -3.79352000 | 1.29139400  | -1.44635100 |
| H | -4.64050500 | 1.04086000  | 0.08720900  |
| H | -3.21675100 | 2.08018000  | 0.03493800  |
| C | -2.89957100 | -1.28013700 | -2.34551800 |
| H | -2.08231600 | -1.69512400 | -2.94359700 |
| H | -3.73535300 | -1.98847300 | -2.41012300 |
| H | -3.21869900 | -0.34179400 | -2.80383100 |
| C | -1.27784500 | -3.40018400 | -0.66779100 |
| H | -0.48638200 | -3.84612800 | -0.06226500 |
| H | -2.14997300 | -4.06476100 | -0.62244400 |
| H | -0.94547900 | -3.36765600 | -1.70907800 |
| H | 0.74571500  | -0.24435500 | 1.11348400  |
| C | 1.43396000  | -1.30211000 | -1.03119900 |
| H | 1.20549400  | -2.36903500 | -1.01598700 |
| N | 0.81698100  | -0.49179300 | -1.91899500 |
| H | 0.13700300  | -1.04088200 | -2.44997200 |
| C | 2.77067100  | -0.97213500 | -0.47678100 |
| C | 3.39295700  | -1.89672000 | 0.37790000  |
| C | 3.45744400  | 0.20314200  | -0.81997800 |

|   |            |             |             |
|---|------------|-------------|-------------|
| C | 4.66180400 | -1.64334200 | 0.89774100  |
| H | 2.87441700 | -2.81729400 | 0.63472800  |
| C | 4.72762000 | 0.45421200  | -0.30158500 |
| H | 2.99717100 | 0.90969400  | -1.50145300 |
| C | 5.33290300 | -0.46378200 | 0.56241400  |
| H | 5.12844300 | -2.36714900 | 1.55975800  |
| H | 5.24989600 | 1.36582400  | -0.57791800 |
| H | 6.32295600 | -0.26605300 | 0.96281400  |
| I | 0.15743400 | 2.71325500  | 0.00743800  |

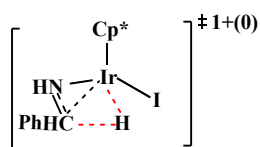

I-TS<sub>11,12</sub>

E=-831.8863781(au)

|    |             |             |             |
|----|-------------|-------------|-------------|
| C  | -2.12576200 | -1.18663300 | 1.29594000  |
| C  | -2.01845200 | -1.92044600 | 0.03719200  |
| C  | -2.42200300 | -1.03473900 | -1.03160700 |
| C  | -2.51932100 | 0.14776000  | 1.00435200  |
| C  | -2.66785900 | 0.26230500  | -0.45432700 |
| Ir | -0.57828400 | -0.25037600 | -0.08265700 |
| C  | -1.72638300 | -3.38426100 | -0.10849400 |
| H  | -2.64959800 | -3.97458600 | -0.04312000 |
| H  | -1.26169600 | -3.59952300 | -1.07400700 |
| H  | -1.05390900 | -3.74099100 | 0.67631800  |
| C  | -1.88942200 | -1.77009100 | 2.65747600  |
| H  | -1.60058200 | -1.00169700 | 3.37732900  |
| H  | -2.80173200 | -2.25431100 | 3.02846000  |

|   |             |             |             |
|---|-------------|-------------|-------------|
| H | -1.09993500 | -2.52542900 | 2.63970300  |
| C | -2.81751200 | 1.24120600  | 1.98393700  |
| H | -2.40326700 | 2.19345100  | 1.64507300  |
| H | -3.90171700 | 1.35954900  | 2.10717200  |
| H | -2.38866000 | 1.02717400  | 2.96520700  |
| C | -3.19461500 | 1.47213700  | -1.16431200 |
| H | -2.91484800 | 1.46994800  | -2.21974500 |
| H | -4.29041000 | 1.50146300  | -1.10128700 |
| H | -2.79999600 | 2.38887000  | -0.72219600 |
| C | -2.50732600 | -1.41227900 | -2.47893300 |
| H | -1.59037300 | -1.91259100 | -2.80324400 |
| H | -3.35371100 | -2.08830800 | -2.65103600 |
| H | -2.64481900 | -0.53292700 | -3.11069500 |
| H | 0.99567800  | -0.72315000 | 0.63486600  |
| C | 1.54173000  | -1.25928600 | -0.43894100 |
| H | 1.32992900  | -2.31650700 | -0.26013100 |
| N | 0.84644100  | -0.76133000 | -1.55655600 |
| H | 1.30744500  | 0.08477500  | -1.89333000 |
| C | 3.00012100  | -0.96487100 | -0.17748100 |
| C | 3.76905700  | -1.94577100 | 0.46426400  |
| C | 3.61619100  | 0.22841700  | -0.57487800 |
| C | 5.12771600  | -1.74383700 | 0.70355400  |
| H | 3.30009600  | -2.87858200 | 0.76941400  |
| C | 4.97568500  | 0.42948100  | -0.33729300 |
| H | 3.03268700  | 1.00971900  | -1.04920900 |
| C | 5.73503500  | -0.55290400 | 0.30146900  |
| H | 5.71071800  | -2.51603400 | 1.19722600  |



|   |            |             |             |
|---|------------|-------------|-------------|
| H | 5.44066200 | 1.36045700  | -0.64818700 |
| H | 6.79343400 | -0.39112500 | 0.48459900  |
| I | 0.45634200 | 2.32134900  | 0.09848600  |

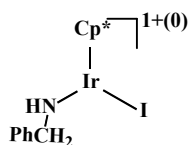

I-12

E=-831.9245004(au)

|    |             |             |             |
|----|-------------|-------------|-------------|
| C  | -0.94069600 | -1.29739200 | 1.64232100  |
| C  | 0.04900800  | -2.01055900 | 0.84090300  |
| C  | -0.59205100 | -2.39664500 | -0.39672300 |
| C  | -2.18952000 | -1.30733300 | 0.92799000  |
| C  | -1.97893400 | -1.93672400 | -0.33744000 |
| Ir | -0.51908200 | -0.23697800 | -0.24944800 |
| C  | 1.41602200  | -2.40713500 | 1.30115200  |
| H  | 1.35011800  | -3.32508100 | 1.89915800  |
| H  | 2.08441400  | -2.60210900 | 0.46006000  |
| H  | 1.86668900  | -1.63402700 | 1.92793200  |
| C  | -0.72111800 | -0.78550300 | 3.03113800  |
| H  | -1.38638500 | 0.04963600  | 3.26127400  |
| H  | -0.91968300 | -1.58135000 | 3.76082900  |
| H  | 0.30968100  | -0.45268400 | 3.17602400  |
| C  | -3.48524000 | -0.73768000 | 1.41758500  |
| H  | -4.09700800 | -0.35884200 | 0.59562500  |
| H  | -4.06415000 | -1.51604300 | 1.93053600  |
| H  | -3.32657900 | 0.07711800  | 2.12707400  |
| C  | -3.01166800 | -2.18635100 | -1.39067400 |

|   |             |             |             |
|---|-------------|-------------|-------------|
| H | -2.56922400 | -2.19378800 | -2.38984800 |
| H | -3.48408600 | -3.16405500 | -1.22948500 |
| H | -3.79894100 | -1.42937000 | -1.37005600 |
| C | -0.01718100 | -3.27169500 | -1.46534500 |
| H | 1.07302700  | -3.20940800 | -1.49253300 |
| H | -0.28683900 | -4.31809400 | -1.27342100 |
| H | -0.40271100 | -3.00605300 | -2.45302000 |
| C | 2.22768900  | -0.05659600 | -1.62919300 |
| H | 2.49322700  | 0.29470100  | -2.63861000 |
| H | 2.11574100  | -1.14119800 | -1.70298200 |
| N | 0.95275800  | 0.52833800  | -1.24327200 |
| H | 0.93444700  | 1.53409700  | -1.38762300 |
| C | 3.39756200  | 0.25229900  | -0.70113100 |
| C | 4.41342800  | -0.69860200 | -0.52715800 |
| C | 3.51455500  | 1.48383900  | -0.04154500 |
| C | 5.51989500  | -0.42794400 | 0.28172900  |
| H | 4.33655800  | -1.65906100 | -1.03155400 |
| C | 4.61780500  | 1.75617200  | 0.77156900  |
| H | 2.74017100  | 2.23627600  | -0.16104000 |
| C | 5.62500500  | 0.80173400  | 0.93657500  |
| H | 6.29386800  | -1.18027000 | 0.40648800  |
| H | 4.69033400  | 2.71585700  | 1.27600300  |
| H | 6.48114000  | 1.01328900  | 1.57071700  |
| I | -1.62643700 | 2.46709700  | -0.10040900 |

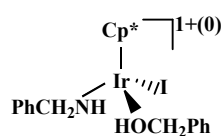

I-13

E=-1178.565974(au)

|    |             |             |             |
|----|-------------|-------------|-------------|
| C  | -1.31460700 | -0.38211500 | -2.26643700 |
| C  | -2.51807700 | 0.35294500  | -1.95070800 |
| C  | -3.29717300 | -0.46669500 | -1.02457000 |
| C  | -1.38334200 | -1.66854800 | -1.57259400 |
| C  | -2.61718700 | -1.72734600 | -0.85503200 |
| Ir | -1.35889500 | 0.06618600  | -0.14989200 |
| N  | -0.34051400 | 1.66323500  | 0.28725500  |
| H  | -0.16106200 | 1.84853700  | 1.27206700  |
| H  | 2.70054800  | -0.28374700 | -1.62325400 |
| H  | 3.63877800  | 0.60361800  | -0.40806400 |
| C  | -2.96124600 | 1.64720100  | -2.55478500 |
| H  | -3.59107300 | 1.45049700  | -3.43181100 |
| H  | -3.55121200 | 2.23686700  | -1.84854400 |
| H  | -2.11188100 | 2.25019800  | -2.88292000 |
| C  | -0.27000200 | -0.00202100 | -3.26706200 |
| H  | 0.70775600  | -0.40701300 | -2.99316900 |
| H  | -0.53535200 | -0.40699500 | -4.25203200 |
| H  | -0.17974700 | 1.08223700  | -3.36707000 |
| C  | -0.35590400 | -2.75074700 | -1.68001300 |
| H  | -0.47572600 | -3.49435000 | -0.88944700 |
| H  | -0.45031700 | -3.26533000 | -2.64462000 |
| H  | 0.65725100  | -2.34563500 | -1.61676900 |
| C  | -3.12239700 | -2.88202800 | -0.04655300 |
| H  | -3.70765100 | -2.54511200 | 0.81190900  |
| H  | -3.77379000 | -3.51151900 | -0.66564500 |

|   |             |             |             |
|---|-------------|-------------|-------------|
| H | -2.30758400 | -3.50891100 | 0.32202500  |
| C | -4.64714100 | -0.11132800 | -0.48610800 |
| H | -4.74115500 | 0.96658100  | -0.33186900 |
| H | -5.42847300 | -0.41620800 | -1.19442600 |
| H | -4.84338400 | -0.61307500 | 0.46409000  |
| C | 3.07196900  | -0.31966500 | -0.59062000 |
| O | 1.98486200  | -0.42245600 | 0.34064600  |
| H | 1.36595300  | 0.32269200  | 0.19760900  |
| C | -0.09805600 | 2.85677100  | -0.52930700 |
| H | -0.14558400 | 2.57420300  | -1.58366800 |
| H | -0.89502200 | 3.59714400  | -0.35930600 |
| C | 1.24213900  | 3.50156000  | -0.23383900 |
| C | 1.39387400  | 4.35066500  | 0.87227400  |
| C | 2.35769200  | 3.24711900  | -1.04416000 |
| C | 2.63166600  | 4.92727200  | 1.16578300  |
| H | 0.53315900  | 4.56662600  | 1.50114600  |
| C | 3.59693100  | 3.82545300  | -0.75626700 |
| H | 2.25121300  | 2.59921200  | -1.91057700 |
| C | 3.73709300  | 4.66577600  | 0.35129500  |
| H | 2.73174200  | 5.58603400  | 2.02383500  |
| H | 4.44947800  | 3.62449000  | -1.39909600 |
| H | 4.69886500  | 5.11861600  | 0.57444200  |
| C | 3.97219500  | -1.51833700 | -0.41175600 |
| C | 4.00424600  | -2.54725800 | -1.36118800 |
| C | 4.76660200  | -1.63538400 | 0.73888200  |
| C | 4.81534900  | -3.67000000 | -1.17009800 |
| H | 3.39226900  | -2.46708400 | -2.25627300 |

|   |             |             |             |
|---|-------------|-------------|-------------|
| C | 5.57373200  | -2.75623700 | 0.93539000  |
| H | 4.75171700  | -0.84167600 | 1.48162000  |
| C | 5.60030100  | -3.77732500 | -0.02033000 |
| H | 4.83141100  | -4.45878700 | -1.91691200 |
| H | 6.18499600  | -2.83301900 | 1.83023700  |
| H | 6.23010300  | -4.64927100 | 0.13140000  |
| I | -1.24827400 | -0.65467000 | 2.64750300  |

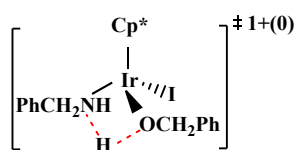

I-TS<sub>13,14</sub>

E=-1178.544535(au)

|    |             |             |             |
|----|-------------|-------------|-------------|
| C  | -1.72393800 | -0.14305900 | -2.33280400 |
| C  | -2.23554300 | 1.07693500  | -1.74756800 |
| C  | -3.11444000 | 0.71999000  | -0.65831900 |
| C  | -2.36524000 | -1.25595200 | -1.63729200 |
| C  | -3.22311200 | -0.73847900 | -0.62784700 |
| Ir | -1.12219500 | -0.01840200 | -0.20732400 |
| N  | 0.64459900  | 1.09058900  | 0.11811700  |
| H  | 0.60028400  | 1.54636100  | 1.02784800  |
| H  | 0.68456000  | -3.03731700 | -0.83730700 |
| H  | 1.31257400  | -1.65373300 | -1.74448100 |
| C  | -1.99742700 | 2.46757200  | -2.24963000 |
| H  | -2.79518300 | 2.74968900  | -2.94862400 |
| H  | -1.99840900 | 3.19282100  | -1.43287000 |
| H  | -1.04650900 | 2.55367300  | -2.77849200 |
| C  | -0.89243600 | -0.24846000 | -3.57637500 |

|   |             |             |             |
|---|-------------|-------------|-------------|
| H | -0.28284700 | -1.15554300 | -3.57687200 |
| H | -1.52981700 | -0.27938100 | -4.47007000 |
| H | -0.21747400 | 0.60449700  | -3.68147300 |
| C | -2.18172800 | -2.70403600 | -1.97669900 |
| H | -2.31837000 | -3.34172000 | -1.10091700 |
| H | -2.91613200 | -3.00901300 | -2.73305700 |
| H | -1.18862500 | -2.89982000 | -2.38665900 |
| C | -4.12981900 | -1.52298700 | 0.27082500  |
| H | -4.18905200 | -1.07190100 | 1.26312800  |
| H | -5.14212200 | -1.56251500 | -0.15220800 |
| H | -3.77861900 | -2.54925600 | 0.39890700  |
| C | -3.94890000 | 1.66613000  | 0.15033400  |
| H | -3.48208600 | 2.65099600  | 0.21798300  |
| H | -4.93683700 | 1.78843800  | -0.31275900 |
| H | -4.08546100 | 1.29765200  | 1.16848500  |
| C | 1.29889600  | -2.13191900 | -0.75268900 |
| O | 0.68404100  | -1.29621700 | 0.21934700  |
| H | 1.09437900  | -0.27478600 | 0.23374200  |
| C | 1.17612900  | 2.03201000  | -0.87173600 |
| H | 1.25966400  | 1.50186600  | -1.82962500 |
| H | 0.50054400  | 2.88325300  | -1.03705800 |
| C | 2.53608800  | 2.57332700  | -0.46581300 |
| C | 2.69494400  | 3.92240600  | -0.12886200 |
| C | 3.65392600  | 1.72857800  | -0.40111900 |
| C | 3.93978900  | 4.42264500  | 0.26095900  |
| H | 1.83521500  | 4.58754200  | -0.17162400 |
| C | 4.89765700  | 2.22361800  | -0.01254600 |

|   |             |             |             |
|---|-------------|-------------|-------------|
| H | 3.54852400  | 0.67579500  | -0.65062700 |
| C | 5.04467900  | 3.57350300  | 0.31955600  |
| H | 4.04369200  | 5.47283300  | 0.51967300  |
| H | 5.75331300  | 1.55564500  | 0.03220300  |
| H | 6.01408000  | 3.95856700  | 0.62320700  |
| C | 2.71173600  | -2.50453000 | -0.34677300 |
| C | 3.01546100  | -2.77795400 | 0.99399600  |
| C | 3.72525800  | -2.60437300 | -1.30716300 |
| C | 4.30840900  | -3.14939800 | 1.36110000  |
| H | 2.23517900  | -2.67882400 | 1.74199200  |
| C | 5.01909100  | -2.98261300 | -0.94059300 |
| H | 3.50256400  | -2.38430500 | -2.34922600 |
| C | 5.31318100  | -3.25636900 | 0.39559300  |
| H | 4.53361000  | -3.35352500 | 2.40419700  |
| H | 5.79608900  | -3.05437500 | -1.69668400 |
| H | 6.31983000  | -3.54477200 | 0.68490100  |
| I | -1.39317000 | 0.01253300  | 2.57821700  |

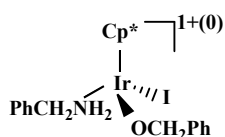

I-14

E=-1178.574148(au)

|   |            |             |             |
|---|------------|-------------|-------------|
| C | 1.38228600 | -2.62964000 | -1.47650800 |
| C | 0.29899800 | -2.98828300 | -0.59090100 |
| C | 0.75833100 | -2.80136800 | 0.75270200  |
| C | 2.56611300 | -2.33832100 | -0.66258200 |
| C | 2.17537000 | -2.42651100 | 0.70771900  |

|    |             |             |             |
|----|-------------|-------------|-------------|
| Ir | 0.97033500  | -0.87556800 | -0.29129300 |
| N  | -0.86817400 | 0.27043500  | -0.66710600 |
| H  | -1.58821400 | 0.02747900  | 0.01868000  |
| H  | 3.44354100  | 0.65305000  | 0.79536300  |
| H  | 3.59491400  | 1.08316100  | -0.91889300 |
| C  | -1.06053900 | -3.46906100 | -0.99284700 |
| H  | -1.10372100 | -4.56269800 | -0.91947600 |
| H  | -1.84032100 | -3.06338600 | -0.34300700 |
| H  | -1.29459400 | -3.19979900 | -2.02464800 |
| C  | 1.36316700  | -2.70051500 | -2.96927100 |
| H  | 2.05643200  | -1.97920600 | -3.40855400 |
| H  | 1.66966600  | -3.70207600 | -3.29704400 |
| H  | 0.36433200  | -2.50772200 | -3.36748900 |
| C  | 3.93504000  | -2.06141900 | -1.19649500 |
| H  | 4.55929500  | -1.55094900 | -0.46033500 |
| H  | 4.42665500  | -3.00649000 | -1.45855200 |
| H  | 3.89519800  | -1.44863800 | -2.10107200 |
| C  | 3.05233400  | -2.22950200 | 1.90165600  |
| H  | 2.49131900  | -1.81659700 | 2.74373400  |
| H  | 3.46818900  | -3.19352500 | 2.22058200  |
| H  | 3.88748900  | -1.56103200 | 1.68022900  |
| C  | -0.02399400 | -3.07126700 | 1.99699700  |
| H  | -1.09207800 | -2.90493500 | 1.84106500  |
| H  | 0.11494000  | -4.11638600 | 2.30212700  |
| H  | 0.30620000  | -2.43662100 | 2.82242700  |
| C  | 3.02687600  | 1.28551800  | 0.00004400  |
| O  | 1.64611200  | 0.98171900  | -0.20803900 |



|   |             |             |             |
|---|-------------|-------------|-------------|
| H | -0.61939200 | 1.24709200  | -0.49828600 |
| C | -1.44242200 | 0.14667700  | -2.04175600 |
| H | -0.65586600 | 0.42193900  | -2.74767800 |
| H | -1.68627600 | -0.90509300 | -2.19690600 |
| C | -2.66614100 | 1.01190200  | -2.24463900 |
| C | -2.53108500 | 2.35518500  | -2.62387900 |
| C | -3.95127500 | 0.49272700  | -2.03508800 |
| C | -3.65696000 | 3.16441700  | -2.78765600 |
| H | -1.53864400 | 2.76526300  | -2.79567100 |
| C | -5.07921200 | 1.29956600  | -2.19997800 |
| H | -4.06713600 | -0.54819300 | -1.74412200 |
| C | -4.93406800 | 2.63723500  | -2.57637100 |
| H | -3.53869600 | 4.20237800  | -3.08528400 |
| H | -6.06924900 | 0.88311600  | -2.03801000 |
| H | -5.81108200 | 3.26446100  | -2.70765200 |
| C | 3.16967800  | 2.74234000  | 0.38371000  |
| C | 3.05496700  | 3.13526600  | 1.72516300  |
| C | 3.36304300  | 3.72839300  | -0.59351600 |
| C | 3.13252300  | 4.48257400  | 2.08347800  |
| H | 2.91122400  | 2.37824200  | 2.49261400  |
| C | 3.44228200  | 5.07761900  | -0.23960300 |
| H | 3.45776200  | 3.43487500  | -1.63637600 |
| C | 3.32562400  | 5.45727000  | 1.10026900  |
| H | 3.04600300  | 4.77157200  | 3.12718000  |
| H | 3.59714300  | 5.83104800  | -1.00687200 |
| H | 3.38884100  | 6.50578500  | 1.37717800  |
| I | -3.35447100 | 0.01699900  | 2.52027200  |

## S-TS1

E=-478.4010187 (au)

|   |             |             |             |
|---|-------------|-------------|-------------|
| C | -1.97991700 | -1.49370300 | -0.31297600 |
| H | -1.01649700 | -2.02622800 | -0.33494300 |
| O | -1.84971200 | -0.13190900 | -0.13656800 |
| N | -2.52273000 | -1.71038200 | -1.74314900 |
| H | -2.39206000 | -2.67166300 | -2.06259900 |
| H | -3.51847300 | -1.48113100 | -1.77929300 |
| H | -1.94702900 | -0.96564800 | -2.31774800 |
| O | -1.12125400 | 0.33406800  | -2.40070700 |
| H | -1.41919400 | 0.22219000  | -1.13029000 |
| C | -2.89878700 | -2.15253300 | 0.69409700  |
| C | -2.64988700 | -3.46189200 | 1.12064200  |
| C | -4.01819700 | -1.47036100 | 1.18722900  |
| C | -3.51013500 | -4.08552700 | 2.02687900  |
| H | -1.77710100 | -3.99046900 | 0.74568200  |
| C | -4.87876900 | -2.09323800 | 2.09158800  |
| H | -4.20375700 | -0.45046500 | 0.86622000  |
| C | -4.62719000 | -3.40229700 | 2.51252800  |
| H | -3.30567600 | -5.10007900 | 2.35585000  |
| H | -5.74414300 | -1.55710100 | 2.47014400  |
| H | -5.29581200 | -3.88475700 | 3.21934900  |
| H | -0.20532300 | 0.02344700  | -2.45305100 |

## S-TS2

E=-478.3853634 (au)

|   |             |             |             |
|---|-------------|-------------|-------------|
| C | -1.25787700 | -1.50606500 | -0.53180000 |
| H | -0.27454600 | -1.95142600 | -0.55797200 |
| O | 0.01313500  | -0.74109100 | 1.42342300  |
| H | -0.76085100 | -0.25743700 | 1.74564600  |
| N | -2.17914200 | -2.18920000 | 0.09169200  |
| H | -3.12597500 | -1.83332000 | 0.17136600  |
| H | -1.79993900 | -2.82490700 | 0.83329000  |
| O | -0.58065700 | -3.04567300 | 2.05268500  |
| H | -0.26824600 | -1.98825500 | 1.81443500  |
| C | -1.48892700 | -0.33882100 | -1.36808400 |
| C | -0.39726300 | 0.16662000  | -2.09742100 |
| C | -2.74423400 | 0.28903100  | -1.47650800 |
| C | -0.55700400 | 1.27435700  | -2.92449000 |
| H | 0.57184400  | -0.31405200 | -2.00441600 |
| C | -2.89904500 | 1.39440200  | -2.30598300 |
| H | -3.59780900 | -0.07932700 | -0.91627400 |
| C | -1.80792800 | 1.88776600  | -3.03022700 |
| H | 0.28898700  | 1.65918400  | -3.48455300 |
| H | -3.86866200 | 1.87448600  | -2.38894000 |
| H | -1.93457000 | 2.75194600  | -3.67506300 |
| H | 0.07663400  | -3.58740400 | 1.59287100  |

### Sol-TS3

E=-748.5959627(au)

|   |            |            |             |
|---|------------|------------|-------------|
| C | 1.58701000 | 1.41414100 | -0.53289600 |
| H | 1.25533600 | 1.45235400 | -1.58767100 |
| O | 1.86052000 | 2.50050000 | 0.07244800  |

|   |             |             |             |
|---|-------------|-------------|-------------|
| C | -0.77734200 | 0.05307900  | -0.82670100 |
| H | -0.90605600 | 0.55504300  | -1.80235500 |
| H | -0.20234300 | -0.86594300 | -1.03788500 |
| O | -0.07681300 | 0.86071600  | 0.08940800  |
| H | 0.26675300  | 3.58495100  | 0.03263300  |
| H | -0.68892600 | 2.27094300  | 0.15300000  |
| C | 2.39399200  | 0.17961400  | -0.22899400 |
| C | 2.54184100  | -0.83058700 | -1.18748600 |
| C | 3.02865400  | 0.04022400  | 1.01324600  |
| C | 3.29941300  | -1.97096800 | -0.90536700 |
| H | 2.07262500  | -0.71615700 | -2.16134000 |
| C | 3.78149900  | -1.09715700 | 1.29788400  |
| H | 2.92687700  | 0.83439800  | 1.74662700  |
| C | 3.91728600  | -2.10786800 | 0.33907200  |
| H | 3.41079300  | -2.74695700 | -1.65724100 |
| H | 4.26681600  | -1.19799400 | 2.26460800  |
| H | 4.50711500  | -2.99253900 | 0.56066600  |
| H | -1.27844300 | 3.71981700  | -0.65199800 |
| N | -0.73903200 | 3.36303300  | 0.13646700  |
| H | -1.10583600 | 3.75238100  | 1.00463900  |
| C | -2.14751500 | -0.35284700 | -0.31072800 |
| C | -3.18173600 | -0.64003500 | -1.21260400 |
| C | -2.39828500 | -0.48353200 | 1.06133200  |
| C | -4.43462700 | -1.05394900 | -0.75670400 |
| H | -3.00315500 | -0.53405100 | -2.28023300 |
| C | -3.65242400 | -0.89277000 | 1.52085100  |
| H | -1.60613800 | -0.25545000 | 1.76727000  |

|   |             |             |             |
|---|-------------|-------------|-------------|
| C | -4.67528700 | -1.18073700 | 0.61412000  |
| H | -5.22483400 | -1.26863000 | -1.47078800 |
| H | -3.83063900 | -0.98626000 | 2.58863200  |
| H | -5.65124100 | -1.49651500 | 0.97116700  |

#### Sol-TS4

E= -1018.479688 (au)

|   |             |             |             |
|---|-------------|-------------|-------------|
| C | -3.33713400 | 1.25293800  | 0.94923300  |
| H | -2.61473600 | 0.47131900  | 1.18971400  |
| H | -4.20857900 | 1.13739400  | 1.59744900  |
| N | -2.72188400 | 2.57281100  | 1.29984800  |
| C | -3.74055500 | 5.86341000  | 0.81315200  |
| H | -2.64712300 | 5.86642500  | 0.64315300  |
| H | -4.18659400 | 5.73210900  | -0.18909200 |
| O | -4.12813300 | 4.81074800  | 1.65969600  |
| C | -2.30545700 | 2.77650500  | 2.78880300  |
| H | -3.12670400 | 2.29650400  | 3.34264100  |
| O | -2.22322800 | 4.13657300  | 2.99241300  |
| H | -3.41003200 | 3.37367700  | 1.14708500  |
| H | -3.13860000 | 4.56648400  | 2.48094100  |
| H | -1.90068100 | 2.73926300  | 0.71111300  |
| C | -3.72399000 | 1.20863600  | -0.50937100 |
| C | -2.95498500 | 0.48028900  | -1.42489200 |
| C | -4.85042600 | 1.90877500  | -0.96603600 |
| C | -3.30717000 | 0.44672200  | -2.77600800 |
| H | -2.08157400 | -0.06416300 | -1.07644000 |
| C | -5.20047600 | 1.87851200  | -2.31586400 |
| H | -5.44729800 | 2.48101700  | -0.26034400 |

|   |             |             |             |
|---|-------------|-------------|-------------|
| C | -4.43016000 | 1.14531200  | -3.22333500 |
| H | -2.70577300 | -0.12530000 | -3.47622000 |
| H | -6.07579200 | 2.42189900  | -2.65899500 |
| H | -4.70548500 | 1.11870700  | -4.27341800 |
| C | -1.00321900 | 2.05404900  | 3.06057700  |
| C | -1.00299100 | 0.79206900  | 3.66498600  |
| C | 0.21570100  | 2.64249700  | 2.69611400  |
| C | 0.20011600  | 0.12041900  | 3.89627200  |
| H | -1.94522300 | 0.33870700  | 3.96080200  |
| C | 1.41620800  | 1.97153100  | 2.92558600  |
| H | 0.21718200  | 3.62883600  | 2.24298100  |
| C | 1.41064500  | 0.70811600  | 3.52488000  |
| H | 0.19057000  | -0.85724900 | 4.36862700  |
| H | 2.35638100  | 2.43454200  | 2.64085700  |
| H | 2.34667500  | 0.18796200  | 3.70559900  |
| C | -4.13461600 | 7.24795300  | 1.31458700  |
| C | -4.94928000 | 7.41320200  | 2.43878800  |
| C | -3.69410000 | 8.39227800  | 0.63196700  |
| C | -5.31673300 | 8.69038600  | 2.87477400  |
| H | -5.28944000 | 6.53165200  | 2.97172400  |
| C | -4.05959500 | 9.66767700  | 1.06184000  |
| H | -3.05756300 | 8.28006200  | -0.24346800 |
| C | -4.87423600 | 9.82239200  | 2.18890900  |
| H | -5.94904900 | 8.79876500  | 3.75199200  |
| H | -3.70745500 | 10.54217500 | 0.52147500  |
| H | -5.15840300 | 10.81484000 | 2.52674000  |

**Sol-TS5**

E= -1018.471534 (au)

|   |             |             |             |
|---|-------------|-------------|-------------|
| C | -0.93407600 | -1.22298800 | -0.60578400 |
| H | -1.86315000 | -0.66554300 | -0.57238800 |
| O | -0.74239500 | -0.84074800 | 1.70273900  |
| H | -0.15367800 | -0.07427000 | 1.66844600  |
| N | -1.03767400 | -2.52399300 | -0.57918000 |
| H | -0.18362800 | -3.06477400 | -0.44634800 |
| C | 0.37558100  | -3.62015400 | 2.75593400  |
| H | -0.70195000 | -3.56137800 | 3.01324000  |
| H | 0.54031200  | -4.68326100 | 2.49178000  |
| O | 0.71001900  | -2.78798700 | 1.68766400  |
| H | -0.02121900 | -1.75230300 | 1.73036800  |
| C | -2.26285400 | -3.20935100 | -0.13362000 |
| H | -3.10148500 | -2.54222900 | -0.34179100 |
| H | -2.19309100 | -3.34531500 | 0.95015900  |
| C | -2.44052500 | -4.54186300 | -0.82305000 |
| C | -2.02544200 | -5.72286900 | -0.19594700 |
| C | -3.00685400 | -4.61119500 | -2.10330500 |
| C | -2.17233400 | -6.95487900 | -0.83754800 |
| H | -1.59126800 | -5.67600200 | 0.79935300  |
| C | -3.15435100 | -5.84084100 | -2.74552900 |
| H | -3.33350200 | -3.69834300 | -2.59441400 |
| C | -2.73634900 | -7.01549900 | -2.11339900 |
| H | -1.84959700 | -7.86465200 | -0.34013700 |
| H | -3.59710800 | -5.88366400 | -3.73620300 |
| H | -2.85365200 | -7.97308600 | -2.61200200 |
| C | 0.26907000  | -0.49584600 | -0.99688100 |

|   |             |             |             |
|---|-------------|-------------|-------------|
| C | 0.12351600  | 0.87178100  | -1.29024200 |
| C | 1.53454500  | -1.09929600 | -1.11957300 |
| C | 1.22032700  | 1.62331300  | -1.70444100 |
| H | -0.85367900 | 1.33597500  | -1.19553400 |
| C | 2.62629500  | -0.34220100 | -1.53103900 |
| H | 1.67505100  | -2.14714100 | -0.87746100 |
| C | 2.47243500  | 1.01704200  | -1.82595600 |
| H | 1.09844300  | 2.67744900  | -1.93166600 |
| H | 3.60094400  | -0.81069400 | -1.62218400 |
| H | 3.32930100  | 1.60072200  | -2.14812100 |
| C | 1.15303600  | -3.36085600 | 4.04732600  |
| C | 2.20181800  | -2.43777000 | 4.08878500  |
| C | 0.83340300  | -4.06412100 | 5.21901900  |
| C | 2.91573800  | -2.21649100 | 5.27104400  |
| H | 2.45027100  | -1.89560400 | 3.18210500  |
| C | 1.54340200  | -3.84927000 | 6.40018900  |
| H | 0.01885400  | -4.78598900 | 5.20319100  |
| C | 2.58909400  | -2.91965100 | 6.43148100  |
| H | 3.72707800  | -1.49335100 | 5.28426700  |
| H | 1.28020700  | -4.40180600 | 7.29824700  |
| H | 3.14142300  | -2.74842000 | 7.35102400  |

**Sol-TS6**

E= -1288.581714 (au)

|   |             |            |             |
|---|-------------|------------|-------------|
| N | -1.78899400 | 3.22927200 | -3.27105700 |
| H | -1.97403600 | 4.09587500 | -2.52803100 |
| C | -2.08879500 | 3.78493400 | -4.63653200 |
| H | -1.43901700 | 4.65599300 | -4.74278000 |



|   |             |             |             |
|---|-------------|-------------|-------------|
| H | -1.76997300 | 3.04749700  | -5.37710200 |
| C | -2.61406800 | 2.00994200  | -2.92697100 |
| H | -3.61763100 | 2.37911200  | -2.71505400 |
| H | -2.20961800 | 1.61437000  | -1.99596600 |
| C | -2.68733000 | 0.92833000  | -3.98727900 |
| C | -1.61746000 | 0.05214600  | -4.22644700 |
| C | -3.86917900 | 0.75676000  | -4.72310500 |
| C | -1.71796400 | -0.95007600 | -5.19226200 |
| H | -0.70536400 | 0.14331800  | -3.64715100 |
| C | -3.97427600 | -0.24961500 | -5.68535700 |
| H | -4.71354600 | 1.41361200  | -4.53793200 |
| C | -2.89577800 | -1.10205200 | -5.92774900 |
| H | -0.87849200 | -1.61760300 | -5.36291200 |
| H | -4.89874200 | -0.36718600 | -6.24292400 |
| H | -2.97462900 | -1.88467600 | -6.67653400 |
| C | -3.53057300 | 4.17560500  | -4.89095300 |
| C | -4.38077200 | 4.69925600  | -3.90682800 |
| C | -4.01577600 | 4.05561900  | -6.20167400 |
| C | -5.68346400 | 5.08855400  | -4.22836700 |
| H | -4.03817800 | 4.79794900  | -2.88284400 |
| C | -5.31202000 | 4.45702800  | -6.52593000 |
| H | -3.37080600 | 3.64304500  | -6.97281500 |
| C | -6.15313700 | 4.97353800  | -5.53765000 |
| H | -6.32947800 | 5.48492900  | -3.45055100 |
| H | -5.66700900 | 4.35650600  | -7.54735300 |
| H | -7.16563000 | 5.27864100  | -5.78435000 |
| C | 1.64376400  | 0.58328800  | -0.98424800 |

|   |             |             |             |
|---|-------------|-------------|-------------|
| C | 1.12414100  | 1.27453500  | -2.08155400 |
| C | 0.18937700  | 2.30236300  | -1.90431600 |
| C | -0.20897000 | 2.64002900  | -0.60063300 |
| C | 0.30576300  | 1.94490700  | 0.49361300  |
| C | 1.23253300  | 0.91508900  | 0.30663600  |
| H | 2.36779600  | -0.21058800 | -1.14122200 |
| H | 1.45305100  | 1.01750200  | -3.08481900 |
| H | -0.91672500 | 3.44770000  | -0.44492500 |
| H | -0.01494100 | 2.21145200  | 1.49637900  |
| H | 1.63177700  | 0.37867200  | 1.16220300  |
| C | -0.25645900 | 3.08206800  | -3.13482700 |
| H | 0.09406100  | 2.56506400  | -4.03173700 |
| O | 0.27109400  | 4.38533600  | -3.14191400 |
| O | -1.68951100 | 5.19955000  | -1.68208500 |
| H | -0.30230700 | 4.88744000  | -2.47035700 |
| C | -1.29242600 | 7.59850000  | -1.35968800 |
| C | -0.25807500 | 7.31813900  | -0.46158200 |
| C | 0.47520100  | 8.35187700  | 0.13127300  |
| C | 0.18051200  | 9.68315000  | -0.16414500 |
| C | -0.85490200 | 9.97484000  | -1.05933700 |
| C | -1.58159200 | 8.94155800  | -1.64942600 |
| H | -0.02746500 | 6.28323600  | -0.23241700 |
| H | 1.27713800  | 8.11369100  | 0.82495000  |
| H | 0.74874400  | 10.48650400 | 0.29575600  |
| H | -1.09283000 | 11.00805400 | -1.29733100 |
| H | -2.38401800 | 9.17669200  | -2.34585100 |
| C | -2.11021600 | 6.49214400  | -2.01867000 |

|   |             |            |             |
|---|-------------|------------|-------------|
| H | -3.16766000 | 6.65734900 | -1.73734700 |
| H | -2.07917100 | 6.66895900 | -3.11077500 |

**Sol-TS7**

E= -1288.577602 (au)

|   |             |            |             |
|---|-------------|------------|-------------|
| N | -1.86895400 | 2.50314200 | -2.65052100 |
| H | 1.13207500  | 4.49806900 | -2.90154400 |
| C | -1.88004100 | 2.43479100 | -4.14514700 |
| H | -0.85561800 | 2.22861400 | -4.45651700 |
| H | -2.49654900 | 1.57162000 | -4.40641400 |
| C | -3.17691300 | 2.36240400 | -1.98044100 |
| H | -3.00096100 | 1.88202100 | -1.01499300 |
| H | -3.75195800 | 1.65372800 | -2.58009800 |
| C | -3.98222600 | 3.63922300 | -1.80330200 |
| C | -5.37739400 | 3.52174300 | -1.72906500 |
| C | -3.39558700 | 4.90362700 | -1.66536600 |
| C | -6.17503900 | 4.64517400 | -1.51221000 |
| H | -5.83964000 | 2.54473900 | -1.84398500 |
| C | -4.19914500 | 6.02845300 | -1.45595100 |
| H | -2.31722000 | 5.02230300 | -1.73596600 |
| C | -5.58686800 | 5.90517600 | -1.37565200 |
| H | -7.25432100 | 4.53685200 | -1.45878700 |
| H | -3.73378900 | 7.00490000 | -1.35671400 |
| H | -6.20587600 | 6.78247700 | -1.21329200 |
| C | -2.39461100 | 3.67682400 | -4.83996500 |
| C | -1.53011300 | 4.75373000 | -5.08194300 |
| C | -3.71996400 | 3.75011400 | -5.28656200 |
| C | -1.99102600 | 5.89264600 | -5.74291900 |

|   |             |            |             |
|---|-------------|------------|-------------|
| H | -0.49566400 | 4.68814300 | -4.75881900 |
| C | -4.18111900 | 4.88968400 | -5.94853100 |
| H | -4.39050500 | 2.91199700 | -5.11833900 |
| C | -3.31837800 | 5.96444700 | -6.17436200 |
| H | -1.31272500 | 6.72033900 | -5.92775500 |
| H | -5.21050600 | 4.93536900 | -6.29130200 |
| H | -3.67551300 | 6.84997300 | -6.69173300 |
| C | 1.27262300  | 1.78962400 | 0.98892500  |
| C | 0.86665700  | 1.99266500 | -0.32644200 |
| C | -0.41029900 | 2.51906300 | -0.61230600 |
| C | -1.24844900 | 2.89144100 | 0.45753500  |
| C | -0.82850300 | 2.69863700 | 1.77075800  |
| C | 0.42245900  | 2.13693400 | 2.04104300  |
| H | 2.25286600  | 1.37054500 | 1.19165200  |
| H | 1.53359400  | 1.74173500 | -1.14539500 |
| H | -2.20152200 | 3.37234000 | 0.27764500  |
| H | -1.47856400 | 2.99634900 | 2.58712700  |
| H | 0.73948800  | 1.98773700 | 3.06851800  |
| C | -0.71686600 | 2.62677100 | -2.03835200 |
| H | 0.14290000  | 2.59081200 | -2.69451400 |
| O | 0.05173200  | 5.06067800 | -2.10193600 |
| H | 0.33832900  | 4.89016800 | -1.19479400 |
| C | 6.10597000  | 5.67036000 | -2.28772200 |
| C | 5.14526400  | 5.28086300 | -3.22624800 |
| C | 3.78148200  | 5.48426700 | -2.98499200 |
| C | 3.39529500  | 6.08731800 | -1.77720600 |
| C | 4.35000700  | 6.47540800 | -0.83747100 |

|   |            |            |             |
|---|------------|------------|-------------|
| C | 5.71034600 | 6.26850700 | -1.09035700 |
| H | 7.16009600 | 5.50418100 | -2.49172200 |
| H | 5.45844100 | 4.81305100 | -4.15660900 |
| H | 2.33751400 | 6.24363000 | -1.58150300 |
| H | 4.03545600 | 6.94300100 | 0.09148900  |
| H | 6.45390600 | 6.57203900 | -0.35910000 |
| C | 2.73089100 | 5.06014800 | -3.99851300 |
| H | 3.23750100 | 4.68524500 | -4.89719800 |
| H | 2.15677600 | 5.94841300 | -4.30841600 |
| O | 1.85866100 | 4.04805700 | -3.51773800 |

## 2-H<sub>2</sub>O-S-TS1

E= -554.8457711 (au)

|   |             |             |             |
|---|-------------|-------------|-------------|
| C | -2.30908100 | -1.17637500 | -0.45402200 |
| H | -1.25542500 | -1.48022500 | -0.49390500 |
| O | -2.46340700 | 0.18780400  | -0.29353100 |
| N | -2.85196600 | -1.56545400 | -1.83224200 |
| H | -2.80367600 | -2.57797800 | -1.97114900 |
| H | -3.83396900 | -1.28412200 | -1.89014300 |
| H | -2.25322900 | -1.04506600 | -2.61478200 |
| O | -1.36997000 | -0.26519100 | -3.52991400 |
| H | -1.71878500 | 0.66524100  | -0.86079800 |
| C | -3.03566600 | -1.96984000 | 0.61309700  |
| C | -2.57401900 | -3.24340900 | 0.96619000  |
| C | -4.18176500 | -1.45828900 | 1.23343600  |
| C | -3.25051200 | -3.99937900 | 1.92516100  |
| H | -1.68060400 | -3.64105500 | 0.49132700  |

|   |             |             |             |
|---|-------------|-------------|-------------|
| C | -4.85682800 | -2.21338800 | 2.19376200  |
| H | -4.53653800 | -0.46750200 | 0.97013300  |
| C | -4.39384000 | -3.48518900 | 2.54105000  |
| H | -2.88120100 | -4.98426600 | 2.19494400  |
| H | -5.74263900 | -1.80767200 | 2.67351800  |
| H | -4.91822400 | -4.07032300 | 3.29069700  |
| H | -0.61784900 | -0.85647900 | -3.67937300 |
| O | -0.69778800 | 1.23801900  | -1.74523800 |
| H | -0.99291800 | 0.48450800  | -2.70851500 |
| H | 0.12520400  | 0.86446200  | -1.39851300 |

## 2-H<sub>2</sub>O-S-TS2

E= -554.8295968 (au)

|   |             |             |             |
|---|-------------|-------------|-------------|
| C | -1.07703700 | -1.18614700 | -0.47745100 |
| H | -0.08983300 | -1.62370700 | -0.54012900 |
| O | -0.01972100 | 0.14057000  | 0.97621700  |
| H | -0.82347300 | 0.46453700  | 1.40751000  |
| N | -1.96290600 | -1.86943300 | 0.19974300  |
| H | -2.92789500 | -1.56284300 | 0.25088700  |
| H | -1.62202400 | -2.59803100 | 0.86617700  |
| O | -0.74335200 | -3.54882000 | 1.99801100  |
| H | -0.07416700 | -2.78976800 | 2.20456600  |
| C | -1.41736400 | -0.14938100 | -1.45598200 |
| C | -0.43832700 | 0.21279000  | -2.39563300 |
| C | -2.67930100 | 0.46731900  | -1.50177400 |
| C | -0.71958700 | 1.16272200  | -3.37461100 |
| H | 0.53932500  | -0.25812900 | -2.35493400 |
| C | -2.95471200 | 1.42039700  | -2.47854800 |

|   |             |             |             |
|---|-------------|-------------|-------------|
| H | -3.44528700 | 0.21646000  | -0.77438500 |
| C | -1.97835300 | 1.76700300  | -3.41785900 |
| H | 0.04046100  | 1.43206000  | -4.10097800 |
| H | -3.93082100 | 1.89396900  | -2.50744400 |
| H | -2.19883800 | 2.50918600  | -4.17892000 |
| H | -0.24419000 | -4.15339700 | 1.43051300  |
| O | 0.85731000  | -1.59141100 | 2.44806600  |
| H | 0.57847200  | -1.31978600 | 3.33418700  |
| H | 0.39134700  | -0.67833500 | 1.69998500  |

### H-bond-S-TS1

E= -631.2903035 (au)

|   |             |             |             |
|---|-------------|-------------|-------------|
| C | -1.55889800 | -1.69736500 | -0.22623600 |
| H | -0.97060800 | -2.54615300 | -0.60718700 |
| O | -0.79348700 | -0.72905500 | 0.38567500  |
| N | -2.15224000 | -1.07512100 | -1.50660200 |
| H | -2.64982500 | -1.76296900 | -2.07472600 |
| H | -2.77732800 | -0.27031900 | -1.25581100 |
| H | -1.33697600 | -0.66759900 | -2.01347400 |
| O | 0.10325000  | 0.36633200  | -1.58425400 |
| H | -0.24690800 | -0.21468800 | -0.44139400 |
| C | -2.68487400 | -2.21522800 | 0.64677900  |
| C | -3.16804100 | -3.51595400 | 0.46360500  |
| C | -3.26512500 | -1.39794200 | 1.62447400  |
| C | -4.22376500 | -3.99391000 | 1.24228500  |
| H | -2.71264200 | -4.15597600 | -0.28805700 |
| C | -4.31913000 | -1.87585600 | 2.40436300  |
| H | -2.87851200 | -0.39552700 | 1.77701200  |

|   |             |             |             |
|---|-------------|-------------|-------------|
| C | -4.80161600 | -3.17360600 | 2.21402200  |
| H | -4.58927700 | -5.00585400 | 1.09474600  |
| H | -4.76207800 | -1.23706800 | 3.16278900  |
| H | -5.62022500 | -3.54533400 | 2.82318000  |
| H | 1.06057200  | 0.32984400  | -1.71029200 |
| O | -1.11216800 | 2.59714600  | -1.09624300 |
| H | -0.55571600 | 1.77147100  | -1.30523600 |
| H | -1.25141800 | 3.00881500  | -1.96094300 |
| O | -3.49429500 | 1.29780200  | -0.81847400 |
| H | -3.62044800 | 1.16464200  | 0.13233000  |
| H | -2.64421400 | 1.81263400  | -0.87827300 |

**H-bond-S-TS2**

E= -631.2583648 (au)

|   |             |             |             |
|---|-------------|-------------|-------------|
| C | -0.88518700 | -2.60226600 | -0.12938200 |
| H | 0.14773700  | -2.75099200 | 0.15824200  |
| O | -0.71491400 | -0.91428100 | 1.14207700  |
| H | -1.60705000 | -0.54437000 | 1.05702800  |
| N | -1.76640500 | -3.36051500 | 0.51295000  |
| H | -2.74981900 | -3.26694600 | 0.27863100  |
| H | -1.53904500 | -3.45047100 | 1.52841600  |
| O | -0.88322600 | -2.57384900 | 2.93727700  |
| H | -0.77527200 | -1.60469600 | 2.02852600  |
| C | -1.12009500 | -2.01003800 | -1.44622200 |
| C | -0.00337800 | -1.55314500 | -2.16696100 |
| C | -2.40385000 | -1.88168100 | -2.00457500 |
| C | -0.16438200 | -0.98585300 | -3.42809400 |
| H | 0.98652200  | -1.64791000 | -1.73061900 |



|   |             |             |             |
|---|-------------|-------------|-------------|
| C | -2.56018600 | -1.31351100 | -3.26549100 |
| H | -3.28138500 | -2.21821400 | -1.46185200 |
| C | -1.44311800 | -0.86517500 | -3.97791700 |
| H | 0.70294200  | -0.63864300 | -3.98024600 |
| H | -3.55299900 | -1.21656300 | -3.69287100 |
| H | -1.57125800 | -0.42171800 | -4.96062300 |
| H | 0.02677200  | -2.88491800 | 3.05125500  |
| O | -1.36813800 | -1.60209300 | 5.38851500  |
| H | -1.19756200 | -1.95985600 | 4.47151400  |
| H | -1.77554800 | -2.35188800 | 5.84216300  |
| O | -0.40136200 | -5.95244900 | -0.64762300 |
| H | -0.98748200 | -5.27164600 | -0.28047400 |
| H | 0.01593800  | -6.32543700 | 0.14134400  |

### 3-H<sub>2</sub>O-S-TS1

E= -631.2707977 (au)

|   |             |             |             |
|---|-------------|-------------|-------------|
| C | -1.29893100 | -1.03503200 | -0.45196200 |
| H | -0.31349300 | -1.48034100 | -0.45032000 |
| O | -0.27196700 | 0.40908000  | 0.91652500  |
| H | -0.52027300 | -0.05453700 | 1.72984600  |
| N | -2.20339600 | -1.66826000 | 0.24965200  |
| H | -3.16497200 | -1.35110100 | 0.28161600  |
| H | -1.87989800 | -2.38923500 | 0.92352300  |
| O | -0.99738100 | -3.49981000 | 1.96061300  |
| H | -0.12506300 | -3.04090500 | 2.10621800  |
| C | -1.59799000 | -0.08041000 | -1.52324300 |
| C | -0.51541500 | 0.42621100  | -2.26294600 |
| C | -2.90568200 | 0.30592300  | -1.85960300 |

|   |             |             |             |
|---|-------------|-------------|-------------|
| C | -0.73624600 | 1.30243200  | -3.32142900 |
| H | 0.49360500  | 0.13638200  | -1.98559200 |
| C | -3.12171300 | 1.18326300  | -2.92018600 |
| H | -3.76000400 | -0.07930400 | -1.31136700 |
| C | -2.04026200 | 1.68183600  | -3.65202700 |
| H | 0.10494900  | 1.68926700  | -3.88780000 |
| H | -4.13477800 | 1.47489000  | -3.17831900 |
| H | -2.21423500 | 2.36312200  | -4.47932200 |
| H | -0.78210700 | -4.22175200 | 1.35280300  |
| O | 1.36659600  | -2.26118700 | 2.41028100  |
| H | 1.11891600  | -1.62789300 | 3.09904100  |
| H | 1.58374500  | -1.67229200 | 1.60957600  |
| O | 1.80622300  | -0.70332400 | 0.36491300  |
| H | 2.54369200  | -0.13833100 | 0.63566300  |
| H | 0.79115800  | -0.08244000 | 0.65956100  |

#### 4-H<sub>2</sub>O-S-TS1

E= -707.7082936 (au)

|   |             |             |             |
|---|-------------|-------------|-------------|
| C | -1.30404600 | -1.32366900 | -0.52279500 |
| H | -0.37895400 | -1.86935000 | -0.65480100 |
| O | -0.26494900 | -0.22664500 | 0.93248700  |
| H | -0.29250400 | -0.86803500 | 1.67238000  |
| N | -2.27226200 | -1.99087900 | 0.06860600  |
| H | -3.18237700 | -1.56686900 | 0.19833400  |
| H | -2.04443600 | -2.83163300 | 0.62368200  |
| O | -1.44330900 | -4.20865600 | 1.64083500  |
| H | -0.82587000 | -3.61753200 | 2.13911900  |
| C | -1.56581100 | -0.21034300 | -1.45506000 |

|   |             |             |             |
|---|-------------|-------------|-------------|
| C | -0.46968900 | 0.42516900  | -2.06235100 |
| C | -2.86721900 | 0.20182000  | -1.78133600 |
| C | -0.67301700 | 1.46148200  | -2.96960400 |
| H | 0.53569700  | 0.11595900  | -1.79173400 |
| C | -3.06561800 | 1.24020900  | -2.69039400 |
| H | -3.73287400 | -0.28988500 | -1.34841200 |
| C | -1.97131600 | 1.87230500  | -3.28506400 |
| H | 0.17984600  | 1.94926100  | -3.43135300 |
| H | -4.07582800 | 1.55012000  | -2.93865300 |
| H | -2.12957200 | 2.67897400  | -3.99444100 |
| H | -0.86839800 | -4.66245100 | 1.00767400  |
| O | 2.65146300  | -2.15633900 | 2.00899300  |
| H | 3.02717700  | -1.56002500 | 2.67239100  |
| H | 2.44167700  | -1.53369900 | 1.20792600  |
| O | 2.00121600  | -0.62962300 | 0.06192000  |
| H | 2.48737400  | 0.19347200  | 0.21438800  |
| H | 0.76768900  | -0.36178300 | 0.54741100  |
| O | 0.12125700  | -2.33224500 | 2.81577200  |
| H | 1.09365800  | -2.32730500 | 2.57085600  |
| H | 0.09104800  | -2.23102500 | 3.77739600  |

### **Waters-1**

|   |             |             |             |
|---|-------------|-------------|-------------|
| C | -0.72467900 | -0.80865700 | -0.54159800 |
| H | 0.23652500  | -1.24977500 | -0.81984200 |
| O | -0.26349693 | 0.28416464  | 1.19133361  |
| H | -1.08653693 | 0.74790364  | 1.41479861  |
| N | -1.59442269 | -1.79733190 | -0.35460106 |
| H | -2.51274069 | -1.42217090 | -0.12318906 |

|   |             |             |             |
|---|-------------|-------------|-------------|
| H | -1.34453374 | -2.54394619 | 0.53000354  |
| O | -1.09753045 | -3.14618402 | 1.76947882  |
| H | -0.63459694 | -2.20942227 | 2.29417196  |
| C | -1.17335000 | 0.13480800  | -1.64441300 |
| C | -0.30435600 | 0.43612700  | -2.69898300 |
| C | -2.44523200 | 0.72695400  | -1.61569300 |
| C | -0.69503500 | 1.31905900  | -3.71117000 |
| H | 0.66857900  | -0.04629800 | -2.72235700 |
| C | -2.83696400 | 1.60696900  | -2.62309700 |
| H | -3.12240200 | 0.48518400  | -0.80157700 |
| C | -1.96579900 | 1.89746600  | -3.67749700 |
| H | -0.01222700 | 1.54680400  | -4.52546500 |
| H | -3.82632800 | 2.05208700  | -2.58439600 |
| H | -2.26973000 | 2.58416800  | -4.46220000 |
| H | -0.68153351 | -3.97480699 | 1.49272874  |
| O | -0.01856262 | -1.25901397 | 2.89051562  |
| H | 0.19015165  | -1.23107442 | 3.83583897  |
| H | -0.37335183 | -0.12489558 | 2.27124177  |
| O | 2.32157600  | 0.38425700  | -5.19031400 |
| H | 1.89681900  | -0.11022900 | -5.90494800 |
| H | 3.03239100  | 0.89697100  | -5.60073900 |
| O | 2.92276200  | -1.18496100 | -2.96332200 |
| H | 2.81659200  | -0.67197800 | -3.79353000 |
| H | 3.54079800  | -0.66558500 | -2.43150300 |
| O | -2.74241900 | 4.19757500  | -6.40670300 |
| H | -2.86716000 | 5.15700500  | -6.39573000 |
| H | -3.64600700 | 3.86757200  | -6.50763200 |

|   |             |             |             |
|---|-------------|-------------|-------------|
| O | -5.89284300 | 2.15393000  | -1.09631300 |
| H | -5.89431300 | 3.08014400  | -1.37595300 |
| H | -6.50150100 | 1.74598200  | -1.72810100 |
| O | -5.13959900 | -0.11244900 | 0.47658700  |
| H | -5.24429300 | 0.69461700  | -0.05876000 |
| H | -5.88281700 | -0.04013100 | 1.09293800  |

### **Waters-2**

|   |             |             |             |
|---|-------------|-------------|-------------|
| C | -1.04631500 | -2.61872500 | -0.43168600 |
| H | -0.04245400 | -2.59388100 | -0.03747100 |
| O | -0.85516176 | -1.04737316 | 0.87093207  |
| H | -1.74965976 | -0.85047316 | 0.56609507  |
| N | -1.93832700 | -3.23301900 | 0.28745300  |
| H | -2.92365000 | -3.27190000 | 0.01645100  |
| H | -1.60845571 | -3.31645643 | 1.44862617  |
| O | -0.94703500 | -2.75720100 | 2.69127300  |
| H | -1.01853540 | -1.73616003 | 1.87301456  |
| C | -1.20623000 | -2.00974300 | -1.73308000 |
| C | -0.03321500 | -1.51552100 | -2.33347600 |
| C | -2.44920200 | -1.83242700 | -2.37050000 |
| C | -0.08796000 | -0.89869400 | -3.57717100 |
| H | 0.91012400  | -1.61598800 | -1.80641000 |
| C | -2.49506000 | -1.20579100 | -3.60941200 |
| H | -3.36501400 | -2.17227300 | -1.89920800 |
| C | -1.31876600 | -0.75670200 | -4.22285700 |
| H | 0.81612400  | -0.52327000 | -4.04299900 |
| H | -3.45383500 | -1.06960000 | -4.09613000 |

|   |             |             |             |
|---|-------------|-------------|-------------|
| H | -1.35592400 | -0.29988000 | -5.20704000 |
| H | -0.01669200 | -2.97747700 | 2.52836100  |
| O | -0.87649322 | -1.48802093 | 5.31646487  |
| H | -0.87014522 | -1.92839793 | 4.41036387  |
| H | -1.33594522 | -2.14169793 | 5.86319887  |
| O | 0.05590900  | -5.58563500 | -0.49604400 |
| H | -0.79688500 | -5.15847400 | -0.32715000 |
| H | 0.29509800  | -5.94382700 | 0.37253900  |
| O | -0.71529100 | 0.57639100  | -7.53294800 |
| H | 0.13445100  | 0.72066100  | -7.06809800 |
| H | -1.18676800 | 1.41387700  | -7.38681900 |
| O | 1.69042600  | 0.84761700  | -6.10454100 |
| H | 2.41689100  | 0.34378900  | -6.49214200 |
| H | 2.05690100  | 1.73479500  | -5.98190600 |
| O | 1.69617526  | -3.22895588 | 0.14541746  |
| H | 2.44110865  | -3.11753752 | -0.45281315 |
| H | 1.34531776  | -4.07897724 | -0.10642191 |
| O | -5.99601400 | -1.86359800 | -2.91526900 |
| H | -5.93418400 | -0.93573200 | -3.15507500 |
| H | -5.97737400 | -2.29646800 | -3.78549100 |
| O | -4.85651300 | -3.32781300 | -0.27951000 |
| H | -5.23524900 | -2.50099500 | -0.56973200 |
| H | -4.93388700 | -3.86648400 | -1.07413300 |

**Waters-3**

|   |             |             |             |
|---|-------------|-------------|-------------|
| C | -1.34673100 | -1.17370600 | -0.51799900 |
| H | -0.47532200 | -1.81020600 | -0.58498000 |

|   |             |             |             |
|---|-------------|-------------|-------------|
| O | 0.01752931  | -0.19786254 | 0.58953130  |
| H | -0.51199769 | 0.51825546  | 0.97378730  |
| N | -2.28606500 | -1.55410900 | 0.30321800  |
| H | -3.17308600 | -1.04776300 | 0.43660000  |
| H | -2.05491132 | -2.38140477 | 1.02193191  |
| O | -1.47578457 | -3.29962882 | 1.84112469  |
| H | -0.35999588 | -2.82009990 | 2.24363489  |
| C | -1.51382800 | -0.16032200 | -1.55884600 |
| C | -0.44441100 | 0.03626000  | -2.45263900 |
| C | -2.69355000 | 0.58932300  | -1.71651700 |
| C | -0.54950000 | 0.96921800  | -3.48106400 |
| H | 0.46648800  | -0.54125300 | -2.32271500 |
| C | -2.79251100 | 1.51985400  | -2.74807900 |
| H | -3.53498300 | 0.45223400  | -1.04505300 |
| C | -1.72437200 | 1.71352400  | -3.62971100 |
| H | 0.27984300  | 1.12347700  | -4.16551500 |
| H | -3.70961700 | 2.09022000  | -2.85674800 |
| H | -1.80737500 | 2.43800100  | -4.43579200 |
| H | -1.26190057 | -3.83392282 | 1.05947869  |
| O | 0.61308100  | -1.75721500 | 2.49745700  |
| H | 0.32558100  | -1.38772300 | 3.34400500  |
| H | 0.46284200  | -0.98007000 | 1.76439900  |
| O | 2.00381000  | 2.03181900  | -6.02366800 |
| H | 1.48514100  | 1.98072600  | -6.84508900 |
| H | 1.98518400  | 2.97905600  | -5.81890700 |
| O | 2.48308400  | -1.82940400 | -1.40961700 |
| H | 2.75747300  | -1.68596100 | -2.32493200 |

|   |             |             |             |
|---|-------------|-------------|-------------|
| H | 2.51499900  | -0.91993200 | -1.02331000 |
| O | -1.89092000 | 4.00985300  | -6.48004000 |
| H | -2.25776300 | 4.70515200  | -5.91772500 |
| H | -2.67824500 | 3.55502800  | -6.80632100 |
| O | -6.11965700 | 2.49758400  | -2.00173000 |
| H | -5.96622300 | 3.41788700  | -2.26219300 |
| H | -6.21956700 | 2.04778300  | -2.85284600 |
| O | -4.80631700 | -0.33023400 | 0.94709400  |
| H | -4.53901400 | 0.04670000  | 1.79847500  |
| H | -5.31007100 | -1.12146700 | 1.19265200  |
| O | 2.47107711  | 0.58471772  | -0.34758810 |
| H | 3.12106211  | 0.48874972  | 0.36588290  |
| H | 1.68524786  | 0.40320042  | 0.05181627  |
| O | 2.81531307  | -3.67814607 | 3.17812577  |
| H | 3.24391407  | -3.32058007 | 3.97319477  |
| H | 2.17355707  | -2.97031807 | 2.91422477  |
| O | 0.82436668  | -5.11257644 | 4.09010496  |
| H | 1.62211668  | -4.61538144 | 3.82648696  |
| H | 0.14362168  | -4.74155744 | 3.49829696  |
| O | -4.59751138 | -3.39198554 | -0.76357858 |
| H | -5.28468551 | -2.73769718 | -0.52984147 |
| H | -3.83358204 | -3.06820518 | -0.24459550 |

**OH-S**

|   |             |             |             |
|---|-------------|-------------|-------------|
| C | -1.75531600 | -1.76888700 | -0.49857500 |
| H | -0.86798600 | -2.44775900 | -0.39917700 |
| O | -1.47179800 | -0.46566900 | -0.36222000 |



|   |             |             |             |
|---|-------------|-------------|-------------|
| N | -2.28444400 | -2.07533300 | -1.89499000 |
| H | -2.73241600 | -2.99357900 | -1.91565400 |
| H | -3.02366300 | -1.38544000 | -2.05308800 |
| H | -0.89118800 | -0.85859700 | -3.04348200 |
| O | -0.42259000 | -0.02200800 | -2.87367800 |
| H | -2.50646100 | 0.42823600  | -1.33845300 |
| C | -2.77663700 | -2.27752600 | 0.55577600  |
| C | -2.98620300 | -3.64186300 | 0.79678100  |
| C | -3.51151000 | -1.35268200 | 1.30462400  |
| C | -3.91984000 | -4.07553500 | 1.74070800  |
| H | -2.40157900 | -4.37570200 | 0.24129700  |
| C | -4.45117500 | -1.77714400 | 2.24497400  |
| H | -3.29881000 | -0.30373700 | 1.12111300  |
| C | -4.66215900 | -3.14116700 | 2.46767400  |
| H | -4.06524300 | -5.14047000 | 1.91478600  |
| H | -5.01808400 | -1.04314300 | 2.81521000  |
| H | -5.38929700 | -3.47304400 | 3.20593100  |
| H | -0.56795600 | -0.01028100 | -1.89336400 |
| O | -3.12304800 | 0.96214600  | -1.92086400 |
| H | -2.53804600 | 1.04318400  | -2.69034000 |

**H<sub>3</sub>O<sup>+</sup>-S**

|   |             |             |             |
|---|-------------|-------------|-------------|
| C | -2.24213000 | -1.33038600 | -0.33319800 |
| H | -1.18390500 | -1.61945600 | -0.33623300 |
| O | -2.45156900 | 0.02372000  | -0.27972300 |
| N | -2.74918300 | -1.81451100 | -1.74358600 |

|   |             |             |             |
|---|-------------|-------------|-------------|
| H | -2.66489800 | -2.83055600 | -1.83641100 |
| H | -3.74177800 | -1.57193300 | -1.81691600 |
| H | -2.21934800 | -1.32904700 | -2.51953400 |
| O | -1.41178300 | -0.33662100 | -3.57087400 |
| H | -1.72128700 | 0.52362600  | -0.69740000 |
| C | -3.02270400 | -2.08121100 | 0.71559100  |
| C | -2.67923100 | -3.40778200 | 1.01006900  |
| C | -4.10997400 | -1.47874500 | 1.36101300  |
| C | -3.42790800 | -4.13349500 | 1.93585800  |
| H | -1.81568100 | -3.87258900 | 0.53507000  |
| C | -4.85257200 | -2.20812100 | 2.29043200  |
| H | -4.35574600 | -0.44378200 | 1.15038200  |
| C | -4.51720100 | -3.53357000 | 2.57402900  |
| H | -3.15580100 | -5.15850600 | 2.16660500  |
| H | -5.69069500 | -1.73809400 | 2.79703400  |
| H | -5.09749100 | -4.09646700 | 3.29854600  |
| H | -0.97620300 | -0.51287900 | -4.41706000 |
| O | -0.63274300 | 1.63253300  | -1.77303100 |
| H | -1.01472800 | 0.46538800  | -3.18501500 |
| H | 0.28254700  | 1.81202200  | -1.50251400 |
| H | -1.05476700 | 2.50251700  | -1.85325400 |
